# Supplementary material for: Paternally expressed imprinted genes establish postzygotic hybridization barriers in Arabidopsis thaliana
Source: eLife. 2015 Sep 7;4:e10074. doi: 10.7554/eLife.10074 (PMC4589659; doi:10.7554/eLife.10074)
Supplement: Figure 3—source data 1. — DOI: http://dx.doi.org/10.7554/eLife.10074.014 [file elife10074s001.xlsx]

## Sheet: Sheet1
Figure 3-source data 1: List of genes deregulated in specified crosses. Genes that are deregulated in seeds derived from the following crosses: wild type (wt) x osd1 (A, B), wt x osd1 adm (C, D), wt x osd1 suvh7 (E, F), wt x osd1 peg2 (G, H). Genes in (A and B) are up-regulated and down-regulated compared to wild-type seeds, respectively. Genes in (C, E, G) are up-regulated compared to seeds wt x…
wt x osd1_up	wt x osd1_down	osd1_vs_osd1 adm_up	osd1_vs_osd1 adm_down	osd1_vs_osd1 suvh7_up	osd1_vs_osd1 suvh7_down	osd1_vs_osd1 peg2_up	osd1_vs_osd1 peg2_down
AT1G01460	AT1G01030	AT1G01070	AT1G01980	AT1G01030	AT1G01460	AT1G01390	AT1G01460
AT1G01530	AT1G01070	AT1G01190	AT1G02074	AT1G01390	AT1G01560	AT1G01580	AT1G01560
AT1G01560	AT1G01140	AT1G01420	AT1G02190	AT1G01420	AT1G01570	AT1G02460	AT1G01980
AT1G01570	AT1G01150	AT1G01900	AT1G02250	AT1G01900	AT1G01980	AT1G02630	AT1G02790
AT1G01980	AT1G01225	AT1G02310	AT1G02405	AT1G02730	AT1G02405	AT1G02813	AT1G03050
AT1G02074	AT1G01280	AT1G02470	AT1G02820	AT1G02810	AT1G02450	AT1G02830	AT1G03580
AT1G02190	AT1G01340	AT1G03103	AT1G03720	AT1G03103	AT1G02550	AT1G04370	AT1G04330
AT1G02360	AT1G01420	AT1G03240	AT1G03810	AT1G03320	AT1G02790	AT1G04500	AT1G04360
AT1G02405	AT1G01620	AT1G03470	AT1G04180	AT1G03440	AT1G02820	AT1G04560	AT1G04470
AT1G02550	AT1G01900	AT1G03660	AT1G04778	AT1G03470	AT1G03050	AT1G04800	AT1G05330
AT1G02790	AT1G02310	AT1G03880	AT1G05330	AT1G03880	AT1G03810	AT1G05680	AT1G05580
AT1G02820	AT1G02700	AT1G04370	AT1G05575	AT1G04380	AT1G04240	AT1G06090	AT1G06810
AT1G02940	AT1G02720	AT1G04380	AT1G05770	AT1G04425	AT1G04445	AT1G06920	AT1G07330
AT1G02965	AT1G02730	AT1G04425	AT1G06030	AT1G04500	AT1G04470	AT1G06925	AT1G07340
AT1G02980	AT1G02810	AT1G04500	AT1G06520	AT1G04520	AT1G05575	AT1G07160	AT1G07620
AT1G03445	AT1G02850	AT1G04560	AT1G06923	AT1G04560	AT1G05580	AT1G08005	AT1G07850
AT1G03800	AT1G03055	AT1G04800	AT1G08140	AT1G04645	AT1G05894	AT1G08105	AT1G08140
AT1G03810	AT1G03440	AT1G04920	AT1G09240	AT1G04680	AT1G06020	AT1G10480	AT1G08150
AT1G04445	AT1G03457	AT1G05250	AT1G10010	AT1G04760	AT1G06540	AT1G10880	AT1G09080
AT1G04457	AT1G03470	AT1G05420	AT1G10620	AT1G04800	AT1G06810	AT1G11145	AT1G09240
AT1G04470	AT1G03840	AT1G05740	AT1G10717	AT1G04920	AT1G07560	AT1G11785	AT1G10770
AT1G05135	AT1G03880	AT1G06160	AT1G10745	AT1G05250	AT1G08065	AT1G12160	AT1G10800
AT1G05291	AT1G04250	AT1G06225	AT1G10800	AT1G05370	AT1G08140	AT1G12260	AT1G11040
AT1G05510	AT1G04360	AT1G06360	AT1G11362	AT1G05530	AT1G08150	AT1G12660	AT1G11080
AT1G05580	AT1G04380	AT1G08105	AT1G11593	AT1G06170	AT1G08900	AT1G13550	AT1G11250
AT1G06030	AT1G04425	AT1G08115	AT1G11610	AT1G06360	AT1G09360	AT1G13600	AT1G11610
AT1G07060	AT1G04520	AT1G08320	AT1G11765	AT1G07160	AT1G09880	AT1G14280	AT1G11765
AT1G07330	AT1G04660	AT1G08560	AT1G11806	AT1G07450	AT1G09890	AT1G14540	AT1G11770
AT1G07560	AT1G04680	AT1G09170	AT1G12610	AT1G07473	AT1G10010	AT1G15360	AT1G12610
AT1G07645	AT1G04760	AT1G09950	AT1G12980	AT1G07485	AT1G10190	AT1G15405	AT1G14420
AT1G07690	AT1G04920	AT1G09995	AT1G13680	AT1G07490	AT1G10538	AT1G17180	AT1G14686
AT1G07747	AT1G05160	AT1G10000	AT1G14455	AT1G07680	AT1G10710	AT1G17285	AT1G14688
AT1G08065	AT1G05250	AT1G10480	AT1G14688	AT1G08005	AT1G10745	AT1G17800	AT1G15770
AT1G08140	AT1G05370	AT1G10880	AT1G16150	AT1G08080	AT1G10770	AT1G18240	AT1G16850
AT1G08150	AT1G05420	AT1G11112	AT1G16950	AT1G08105	AT1G11080	AT1G19630	AT1G16950
AT1G08340	AT1G05440	AT1G11340	AT1G17147	AT1G08560	AT1G11145	AT1G21540	AT1G17540
AT1G08985	AT1G05530	AT1G11450	AT1G17150	AT1G09170	AT1G11250	AT1G22490	AT1G18990
AT1G09360	AT1G05560	AT1G12013	AT1G18310	AT1G09483	AT1G11362	AT1G23145	AT1G19115
AT1G09510	AT1G05562	AT1G12080	AT1G18382	AT1G09750	AT1G11370	AT1G23500	AT1G19500
AT1G09880	AT1G05700	AT1G12220	AT1G18390	AT1G09950	AT1G11765	AT1G23720	AT1G19530
AT1G09930	AT1G05835	AT1G12740	AT1G18760	AT1G09995	AT1G11770	AT1G24575	AT1G20310
AT1G10010	AT1G06000	AT1G12805	AT1G18879	AT1G10000	AT1G12030	AT1G25250	AT1G20320
AT1G10190	AT1G06002	AT1G13590	AT1G19090	AT1G10160	AT1G12294	AT1G26350	AT1G23350
AT1G10340	AT1G06170	AT1G13600	AT1G19890	AT1G10880	AT1G12670	AT1G26558	AT1G23480
AT1G10385	AT1G06180	AT1G13670	AT1G20310	AT1G11112	AT1G12855	AT1G27285	AT1G23840
AT1G10710	AT1G06280	AT1G14280	AT1G20657	AT1G11450	AT1G12950	AT1G28000	AT1G24110
AT1G10717	AT1G06310	AT1G14687	AT1G22210	AT1G11740	AT1G13605	AT1G28323	AT1G24270
AT1G10745	AT1G06350	AT1G14880	AT1G22230	AT1G12013	AT1G13650	AT1G28670	AT1G24520
AT1G10790	AT1G06360	AT1G15000	AT1G23020	AT1G12015	AT1G13680	AT1G28700	AT1G24620
AT1G11110	AT1G06990	AT1G15002	AT1G23080	AT1G12070	AT1G14100	AT1G29360	AT1G25230
AT1G11250	AT1G07450	AT1G15050	AT1G23350	AT1G12080	AT1G14150	AT1G29720	AT1G25240
AT1G11362	AT1G07473	AT1G15150	AT1G23420	AT1G12160	AT1G14420	AT1G29860	AT1G26480
AT1G11510	AT1G07476	AT1G15405	AT1G23760	AT1G12220	AT1G14455	AT1G30170	AT1G26780
AT1G11593	AT1G07485	AT1G15885	AT1G23810	AT1G12560	AT1G14780	AT1G30760	AT1G28270
AT1G11595	AT1G07490	AT1G15890	AT1G24020	AT1G12740	AT1G16370	AT1G30972	AT1G28306
AT1G11765	AT1G07540	AT1G16960	AT1G24062	AT1G12805	AT1G16950	AT1G31072	AT1G28591
AT1G11770	AT1G07620	AT1G17010	AT1G24170	AT1G12860	AT1G17150	AT1G31380	AT1G29140
AT1G11810	AT1G08005	AT1G17240	AT1G24400	AT1G13490	AT1G17540	AT1G31450	AT1G29715
AT1G12030	AT1G08320	AT1G17285	AT1G24430	AT1G13590	AT1G17610	AT1G31600	AT1G29780
AT1G12170	AT1G08560	AT1G18240	AT1G24520	AT1G13600	AT1G17770	AT1G31620	AT1G30190
AT1G12190	AT1G09600	AT1G18570	AT1G24590	AT1G13750	AT1G17800	AT1G31710	AT1G30700
AT1G12665	AT1G09750	AT1G18735	AT1G24620	AT1G14280	AT1G18020	AT1G32000	AT1G30814
AT1G12670	AT1G09950	AT1G19460	AT1G24625	AT1G14315	AT1G18050	AT1G32010	AT1G31050
AT1G12672	AT1G09995	AT1G19470	AT1G25240	AT1G14687	AT1G18760	AT1G32280	AT1G31983
AT1G12855	AT1G10000	AT1G19810	AT1G26480	AT1G15000	AT1G18780	AT1G33170	AT1G32840
AT1G13480	AT1G10160	AT1G20290	AT1G26921	AT1G15150	AT1G18990	AT1G33950	AT1G32880
AT1G13605	AT1G10657	AT1G20390	AT1G27140	AT1G15210	AT1G19090	AT1G34170	AT1G33160
AT1G13609	AT1G10880	AT1G20940	AT1G27940	AT1G15360	AT1G19160	AT1G35310	AT1G33340
AT1G13650	AT1G11112	AT1G21529	AT1G28220	AT1G15405	AT1G19530	AT1G35730	AT1G34095
AT1G13680	AT1G11420	AT1G21860	AT1G28281	AT1G15885	AT1G19900	AT1G35790	AT1G35490
AT1G14080	AT1G11450	AT1G22120	AT1G28327	AT1G15890	AT1G20320	AT1G36035	AT1G35550
AT1G14100	AT1G11545	AT1G22490	AT1G28450	AT1G16420	AT1G20657	AT1G36040	AT1G36920
AT1G14110	AT1G11740	AT1G22570	AT1G29660	AT1G16910	AT1G21430	AT1G36630	AT1G40104
AT1G14420	AT1G12064	AT1G22910	AT1G30190	AT1G16960	AT1G21470	AT1G42510	AT1G41797
AT1G14455	AT1G12070	AT1G23145	AT1G30700	AT1G17180	AT1G22015	AT1G47405	AT1G42350
AT1G14870	AT1G12080	AT1G23510	AT1G30720	AT1G17240	AT1G22210	AT1G49470	AT1G42595
AT1G15330	AT1G12220	AT1G23520	AT1G30730	AT1G17285	AT1G22420	AT1G50330	AT1G42700
AT1G15380	AT1G12380	AT1G23570	AT1G30814	AT1G18130	AT1G23020	AT1G50650	AT1G43060
AT1G16120	AT1G12720	AT1G23590	AT1G30925	AT1G18240	AT1G23090	AT1G50770	AT1G43590
AT1G16130	AT1G12740	AT1G23850	AT1G30945	AT1G18370	AT1G23320	AT1G51750	AT1G43970
AT1G16370	AT1G12805	AT1G24792	AT1G31983	AT1G18520	AT1G23350	AT1G51830	AT1G44160
AT1G17000	AT1G12860	AT1G24879	AT1G32430	AT1G18530	AT1G23730	AT1G51860	AT1G45063
AT1G17150	AT1G13080	AT1G25053	AT1G34520	AT1G18940	AT1G24062	AT1G52700	AT1G45190
AT1G17610	AT1G13100	AT1G25250	AT1G34650	AT1G19320	AT1G24400	AT1G53820	AT1G45223
AT1G17770	AT1G13590	AT1G25275	AT1G35183	AT1G19350	AT1G24520	AT1G54040	AT1G45234
AT1G17800	AT1G13620	AT1G25410	AT1G41797	AT1G19460	AT1G24620	AT1G54740	AT1G47395
AT1G17990	AT1G13750	AT1G26350	AT1G41835	AT1G19470	AT1G25240	AT1G54955	AT1G47400
AT1G18020	AT1G14120	AT1G27285	AT1G42550	AT1G20080	AT1G26480	AT1G55070	AT1G47470
AT1G18050	AT1G14280	AT1G28000	AT1G42595	AT1G20290	AT1G28040	AT1G55525	AT1G48020
AT1G18350	AT1G14440	AT1G28330	AT1G43020	AT1G20390	AT1G28270	AT1G57750	AT1G48190
AT1G18760	AT1G14630	AT1G28430	AT1G43140	AT1G20400	AT1G28327	AT1G58370	AT1G48405
AT1G18780	AT1G14687	AT1G28640	AT1G43200	AT1G20530	AT1G28450	AT1G59077	AT1G48730
AT1G18990	AT1G14700	AT1G28670	AT1G43997	AT1G20735	AT1G28460	AT1G59740	AT1G49270
AT1G19090	AT1G14750	AT1G28700	AT1G44510	AT1G20875	AT1G29080	AT1G60450	AT1G49290
AT1G19160	AT1G14760	AT1G28930	AT1G45010	AT1G20940	AT1G29140	AT1G60720	AT1G50810
AT1G20132	AT1G14900	AT1G29600	AT1G45063	AT1G21550	AT1G29180	AT1G61275	AT1G51250
AT1G20135	AT1G15000	AT1G29720	AT1G45190	AT1G22130	AT1G29600	AT1G61800	AT1G51490
AT1G20240	AT1G15010	AT1G30160	AT1G45223	AT1G22600	AT1G29962	AT1G62225	AT1G52970
AT1G20320	AT1G15150	AT1G30170	AT1G47395	AT1G23060	AT1G30250	AT1G62560	AT1G54070
AT1G20360	AT1G15160	AT1G31072	AT1G47400	AT1G23145	AT1G30925	AT1G63245	AT1G54120
AT1G20735	AT1G15210	AT1G31258	AT1G47450	AT1G23510	AT1G31983	AT1G64405	AT1G54550
AT1G20750	AT1G15290	AT1G31450	AT1G47470	AT1G23520	AT1G32180	AT1G64700	AT1G54760
AT1G21290	AT1G15630	AT1G31600	AT1G48000	AT1G23590	AT1G32585	AT1G64800	AT1G54926
AT1G21430	AT1G15825	AT1G31620	AT1G48190	AT1G23650	AT1G33610	AT1G65190	AT1G55560
AT1G21490	AT1G15830	AT1G31710	AT1G48530	AT1G23910	AT1G33760	AT1G65340	AT1G55570
AT1G21525	AT1G15885	AT1G31835	AT1G49290	AT1G23930	AT1G33960	AT1G66230	AT1G55720
AT1G21670	AT1G15890	AT1G31950	AT1G49715	AT1G25209	AT1G34170	AT1G66810	AT1G56085
AT1G22015	AT1G16070	AT1G32000	AT1G49800	AT1G25270	AT1G34310	AT1G69660	AT1G56360
AT1G22080	AT1G16910	AT1G32010	AT1G50190	AT1G25275	AT1G34390	AT1G69930	AT1G57730
AT1G22090	AT1G16960	AT1G32280	AT1G50810	AT1G25410	AT1G34410	AT1G70581	AT1G57775
AT1G22120	AT1G17010	AT1G32560	AT1G51090	AT1G25422	AT1G34650	AT1G71120	AT1G57810
AT1G22210	AT1G17140	AT1G32582	AT1G51240	AT1G25425	AT1G35183	AT1G71140	AT1G58090
AT1G22420	AT1G17180	AT1G32780	AT1G51250	AT1G26350	AT1G35230	AT1G73580	AT1G58120
AT1G22670	AT1G17285	AT1G32910	AT1G51820	AT1G26355	AT1G35240	AT1G74130	AT1G58122
AT1G22760	AT1G17830	AT1G33055	AT1G52200	AT1G26420	AT1G35242	AT1G74660	AT1G60260
AT1G23037	AT1G18100	AT1G33612	AT1G52343	AT1G26796	AT1G35490	AT1G74875	AT1G60270
AT1G23320	AT1G18240	AT1G33615	AT1G52840	AT1G26797	AT1G35520	AT1G76955	AT1G60740
AT1G23480	AT1G18250	AT1G33750	AT1G52970	AT1G27285	AT1G35537	AT1G79100	AT1G61160
AT1G23840	AT1G18265	AT1G33820	AT1G53550	AT1G27710	AT1G35540	AT1G79170	AT1G61563
AT1G24020	AT1G18370	AT1G34245	AT1G54070	AT1G27780	AT1G35545	AT1G79480	AT1G61566
AT1G24062	AT1G18520	AT1G34250	AT1G54550	AT1G28000	AT1G35735	AT2G01360	AT1G61830
AT1G24400	AT1G18910	AT1G34540	AT1G54760	AT1G28640	AT1G36000	AT2G02210	AT1G62214
AT1G24520	AT1G18940	AT1G35513	AT1G54870	AT1G28670	AT1G36920	AT2G02520	AT1G62450
AT1G24570	AT1G19350	AT1G36035	AT1G54926	AT1G28695	AT1G40121	AT2G02840	AT1G64170
AT1G25240	AT1G19460	AT1G36040	AT1G55020	AT1G28700	AT1G43020	AT2G03180	AT1G65390
AT1G26290	AT1G19470	AT1G36240	AT1G55290	AT1G29270	AT1G43140	AT2G03291	AT1G66210
AT1G26480	AT1G19830	AT1G36270	AT1G55370	AT1G29650	AT1G43200	AT2G04047	AT1G66320
AT1G26515	AT1G20080	AT1G36610	AT1G55430	AT1G29720	AT1G43950	AT2G04090	AT1G66640
AT1G26798	AT1G20160	AT1G36620	AT1G55720	AT1G30160	AT1G43960	AT2G04100	AT1G67290
AT1G27250	AT1G20390	AT1G37070	AT1G56233	AT1G30170	AT1G43970	AT2G04115	AT1G68090
AT1G27260	AT1G20900	AT1G42700	AT1G56360	AT1G30280	AT1G43990	AT2G04625	AT1G68110
AT1G27940	AT1G21070	AT1G42705	AT1G56415	AT1G30360	AT1G43997	AT2G04820	AT1G68150
AT1G27990	AT1G21250	AT1G43060	AT1G56430	AT1G30690	AT1G44130	AT2G04980	AT1G68450
AT1G28010	AT1G21510	AT1G43205	AT1G56620	AT1G30930	AT1G44160	AT2G05370	AT1G68620
AT1G28281	AT1G21530	AT1G43250	AT1G57775	AT1G31072	AT1G44941	AT2G05635	AT1G68750
AT1G28370	AT1G21810	AT1G43590	AT1G57810	AT1G31258	AT1G44970	AT2G05995	AT1G68850
AT1G28450	AT1G22170	AT1G43630	AT1G58055	AT1G31510	AT1G45063	AT2G06130	AT1G68960
AT1G28460	AT1G22490	AT1G43780	AT1G58090	AT1G31600	AT1G45223	AT2G07120	AT1G69490
AT1G28480	AT1G22600	AT1G43800	AT1G58150	AT1G31620	AT1G47280	AT2G07185	AT1G69940
AT1G28630	AT1G22650	AT1G43883	AT1G61688	AT1G31670	AT1G47395	AT2G07570	AT1G70540
AT1G29010	AT1G22910	AT1G45035	AT1G62030	AT1G31710	AT1G47400	AT2G07784	AT1G70640
AT1G29080	AT1G23060	AT1G47405	AT1G62214	AT1G31950	AT1G47470	AT2G11850	AT1G71200
AT1G29110	AT1G23340	AT1G47540	AT1G63522	AT1G32010	AT1G47920	AT2G12250	AT1G71450
AT1G29140	AT1G23380	AT1G47770	AT1G64670	AT1G32190	AT1G48020	AT2G12470	AT1G72460
AT1G29600	AT1G23510	AT1G47780	AT1G64830	AT1G32270	AT1G48530	AT2G14230	AT1G73260
AT1G29670	AT1G23520	AT1G47840	AT1G65486	AT1G32280	AT1G48730	AT2G14455	AT1G73330
AT1G29680	AT1G23560	AT1G47980	AT1G65610	AT1G32560	AT1G49270	AT2G14670	AT1G74770
AT1G29962	AT1G23590	AT1G48130	AT1G65770	AT1G32780	AT1G49290	AT2G15640	AT1G74930
AT1G30180	AT1G23670	AT1G48260	AT1G66180	AT1G32830	AT1G49330	AT2G15770	AT1G75160
AT1G30190	AT1G23790	AT1G48510	AT1G66630	AT1G33055	AT1G49610	AT2G16200	AT1G75870
AT1G30790	AT1G23890	AT1G48930	AT1G66830	AT1G33440	AT1G50310	AT2G16210	AT1G76370
AT1G30925	AT1G24060	AT1G49435	AT1G66852	AT1G33460	AT1G50610	AT2G16300	AT1G76770
AT1G30972	AT1G25230	AT1G49470	AT1G67270	AT1G33750	AT1G50750	AT2G16505	AT1G77150
AT1G30974	AT1G25250	AT1G50330	AT1G67328	AT1G34245	AT1G50880	AT2G17050	AT1G78840
AT1G31250	AT1G25275	AT1G50340	AT1G67330	AT1G34250	AT1G51040	AT2G17305	AT1G79250
AT1G31530	AT1G25410	AT1G50610	AT1G67390	AT1G35560	AT1G51230	AT2G17490	AT1G79420
AT1G31630	AT1G25425	AT1G50650	AT1G67623	AT1G35730	AT1G51490	AT2G17723	AT1G80580
AT1G31640	AT1G25530	AT1G50732	AT1G68150	AT1G35750	AT1G51670	AT2G17860	AT2G01024
AT1G31983	AT1G26680	AT1G50960	AT1G68450	AT1G36035	AT1G52960	AT2G18115	AT2G01029
AT1G32020	AT1G26760	AT1G51055	AT1G68850	AT1G36130	AT1G54070	AT2G18150	AT2G01040
AT1G32180	AT1G26920	AT1G51530	AT1G69825	AT1G36590	AT1G54445	AT2G19510	AT2G01090
AT1G32585	AT1G27030	AT1G52020	AT1G70130	AT1G42705	AT1G54760	AT2G19700	AT2G01200
AT1G33020	AT1G27040	AT1G52770	AT1G70270	AT1G43250	AT1G54980	AT2G19850	AT2G01370
AT1G33770	AT1G27285	AT1G52790	AT1G70540	AT1G43590	AT1G55560	AT2G19910	AT2G01554
AT1G34170	AT1G27710	AT1G53690	AT1G70840	AT1G43800	AT1G55570	AT2G19920	AT2G02930
AT1G34310	AT1G28130	AT1G53810	AT1G70985	AT1G45035	AT1G55600	AT2G20150	AT2G03000
AT1G34390	AT1G28290	AT1G54120	AT1G71450	AT1G45201	AT1G55720	AT2G21030	AT2G04000
AT1G34410	AT1G28360	AT1G54215	AT1G71692	AT1G47540	AT1G56233	AT2G21220	AT2G04041
AT1G34650	AT1G28390	AT1G54740	AT1G71695	AT1G47655	AT1G56415	AT2G21880	AT2G04050
AT1G35170	AT1G28430	AT1G54955	AT1G72460	AT1G47840	AT1G56620	AT2G21890	AT2G04220
AT1G35180	AT1G28640	AT1G55964	AT1G72910	AT1G47980	AT1G57810	AT2G22340	AT2G04420
AT1G35183	AT1G28670	AT1G60980	AT1G72970	AT1G48130	AT1G58055	AT2G22496	AT2G04830
AT1G35240	AT1G28695	AT1G61700	AT1G73260	AT1G48510	AT1G58090	AT2G22710	AT2G05110
AT1G35242	AT1G28700	AT1G62045	AT1G73330	AT1G48930	AT1G58120	AT2G22920	AT2G05171
AT1G35490	AT1G28710	AT1G62070	AT1G73550	AT1G49435	AT1G58122	AT2G22942	AT2G05850
AT1G35520	AT1G29270	AT1G62210	AT1G74110	AT1G49470	AT1G58190	AT2G23110	AT2G06430
AT1G35537	AT1G29785	AT1G62225	AT1G74220	AT1G49680	AT1G60740	AT2G23330	AT2G06890
AT1G35540	AT1G29920	AT1G62500	AT1G74480	AT1G50650	AT1G61230	AT2G23640	AT2G07040
AT1G35735	AT1G30170	AT1G62690	AT1G74770	AT1G50732	AT1G61563	AT2G24255	AT2G07669
AT1G36000	AT1G30280	AT1G63820	AT1G74830	AT1G50770	AT1G61566	AT2G24400	AT2G07701
AT1G36200	AT1G30282	AT1G64585	AT1G75160	AT1G51830	AT1G61688	AT2G24696	AT2G07830
AT1G36340	AT1G30360	AT1G64800	AT1G75470	AT1G52190	AT1G62214	AT2G24780	AT2G09795
AT1G41835	AT1G30515	AT1G64820	AT1G75900	AT1G52490	AT1G62630	AT2G25020	AT2G09800
AT1G42410	AT1G30650	AT1G65642	AT1G76135	AT1G52700	AT1G62700	AT2G25030	AT2G10405
AT1G42980	AT1G30690	AT1G65880	AT1G76210	AT1G53282	AT1G62920	AT2G25150	AT2G10410
AT1G43000	AT1G31258	AT1G66120	AT1G76770	AT1G53285	AT1G63205	AT2G25550	AT2G10430
AT1G43020	AT1G31335	AT1G66810	AT1G76830	AT1G53690	AT1G63280	AT2G25980	AT2G11140
AT1G43200	AT1G31440	AT1G66850	AT1G77150	AT1G54010	AT1G63522	AT2G26040	AT2G11150
AT1G43665	AT1G31920	AT1G66910	AT1G77640	AT1G54660	AT1G64170	AT2G26820	AT2G11240
AT1G43720	AT1G31950	AT1G66940	AT1G77700	AT1G54775	AT1G64370	AT2G26880	AT2G11270
AT1G43950	AT1G32080	AT1G66960	AT1G77790	AT1G55964	AT1G64830	AT2G26882	AT2G11280
AT1G43970	AT1G32190	AT1G67025	AT1G77992	AT1G57750	AT1G65385	AT2G27000	AT2G12020
AT1G44090	AT1G32225	AT1G67240	AT1G78400	AT1G58160	AT1G65490	AT2G27229	AT2G12100
AT1G44130	AT1G32280	AT1G67540	AT1G78460	AT1G59312	AT1G65740	AT2G27300	AT2G12170
AT1G45010	AT1G32470	AT1G67710	AT1G79410	AT1G61110	AT1G65770	AT2G27380	AT2G12190
AT1G45063	AT1G32560	AT1G67810	AT2G01024	AT1G61300	AT1G65800	AT2G27520	AT2G12490
AT1G45100	AT1G32780	AT1G67855	AT2G01026	AT1G62070	AT1G65960	AT2G28010	AT2G12505
AT1G47320	AT1G32830	AT1G67856	AT2G01029	AT1G62210	AT1G65970	AT2G28700	AT2G13350
AT1G47395	AT1G32860	AT1G68050	AT2G01034	AT1G62225	AT1G66090	AT2G29880	AT2G13620
AT1G47400	AT1G33055	AT1G68510	AT2G01037	AT1G62500	AT1G66145	AT2G30220	AT2G14060
AT1G47705	AT1G33170	AT1G69180	AT2G01520	AT1G62690	AT1G66210	AT2G30300	AT2G14247
AT1G47760	AT1G33750	AT1G69588	AT2G02890	AT1G63040	AT1G66290	AT2G30540	AT2G14610
AT1G47765	AT1G33820	AT1G70050	AT2G03000	AT1G63820	AT1G66490	AT2G30840	AT2G14620
AT1G47790	AT1G34245	AT1G71120	AT2G03130	AT1G64405	AT1G66630	AT2G31460	AT2G15010
AT1G47800	AT1G34250	AT1G71140	AT2G03160	AT1G64585	AT1G66852	AT2G31480	AT2G15880
AT1G47810	AT1G34430	AT1G71160	AT2G03821	AT1G64700	AT1G66855	AT2G32540	AT2G15960
AT1G48010	AT1G35200	AT1G72430	AT2G03933	AT1G64800	AT1G66860	AT2G32645	AT2G16260
AT1G48020	AT1G35290	AT1G72645	AT2G04000	AT1G65190	AT1G66870	AT2G34060	AT2G16340
AT1G48195	AT1G35420	AT1G73140	AT2G04033	AT1G65710	AT1G67070	AT2G34810	AT2G16730
AT1G48530	AT1G35513	AT1G73270	AT2G04034	AT1G65880	AT1G67130	AT2G34985	AT2G17330
AT1G49190	AT1G35560	AT1G73780	AT2G04037	AT1G66250	AT1G67270	AT2G35215	AT2G17430
AT1G49270	AT1G35730	AT1G73965	AT2G04041	AT1G66940	AT1G67290	AT2G35960	AT2G17890
AT1G49290	AT1G37070	AT1G74660	AT2G04045	AT1G67540	AT1G67390	AT2G36770	AT2G18070
AT1G49330	AT1G37080	AT1G74875	AT2G04440	AT1G67710	AT1G67623	AT2G37870	AT2G18180
AT1G49610	AT1G37130	AT1G75120	AT2G04570	AT1G67810	AT1G67870	AT2G39850	AT2G18470
AT1G49715	AT1G43060	AT1G75260	AT2G05110	AT1G68510	AT1G68090	AT2G40500	AT2G19000
AT1G49900	AT1G43250	AT1G76470	AT2G05335	AT1G69160	AT1G68210	AT2G41300	AT2G19040
AT1G50190	AT1G43590	AT1G76500	AT2G05850	AT1G69920	AT1G68320	AT2G41730	AT2G19050
AT1G50325	AT1G43780	AT1G76728	AT2G05980	AT1G70050	AT1G68620	AT2G42140	AT2G19770
AT1G50400	AT1G43800	AT1G76750	AT2G06430	AT1G70110	AT1G68840	AT2G43580	AT2G20616
AT1G50690	AT1G44110	AT1G76790	AT2G06890	AT1G71120	AT1G68850	AT2G43860	AT2G20800
AT1G50760	AT1G44224	AT1G77340	AT2G10560	AT1G71160	AT1G68880	AT2G44320	AT2G20870
AT1G50980	AT1G44830	AT1G78520	AT2G11150	AT1G71250	AT1G68907	AT2G44550	AT2G21020
AT1G50990	AT1G45201	AT1G78740	AT2G11280	AT1G72430	AT1G68960	AT2G45890	AT2G21080
AT1G51040	AT1G45545	AT1G78865	AT2G12100	AT1G74500	AT1G69050	AT2G46630	AT2G21480
AT1G51120	AT1G47405	AT1G79680	AT2G12505	AT1G74660	AT1G69543	AT2G46770	AT2G21655
AT1G51210	AT1G47540	AT1G80090	AT2G12540	AT1G74890	AT1G69940	AT3G02100	AT2G21727
AT1G51230	AT1G47655	AT2G01360	AT2G12940	AT1G75120	AT1G70270	AT3G03730	AT2G21990
AT1G51240	AT1G47670	AT2G01610	AT2G14247	AT1G75250	AT1G70540	AT3G03820	AT2G22055
AT1G51250	AT1G47740	AT2G02030	AT2G14620	AT1G75940	AT1G72460	AT3G04250	AT2G22145
AT1G51290	AT1G47840	AT2G02100	AT2G14960	AT1G76470	AT1G73260	AT3G05727	AT2G22180
AT1G51320	AT1G47980	AT2G02120	AT2G15310	AT1G76500	AT1G73550	AT3G05858	AT2G22980
AT1G51800	AT1G48130	AT2G02200	AT2G15340	AT1G76530	AT1G73687	AT3G06545	AT2G23220
AT1G51910	AT1G48260	AT2G02210	AT2G15345	AT1G76910	AT1G74220	AT3G07900	AT2G24370
AT1G52211	AT1G48470	AT2G02540	AT2G15660	AT1G76911	AT1G74990	AT3G07970	AT2G24450
AT1G52696	AT1G48480	AT2G02840	AT2G16225	AT1G77330	AT1G75160	AT3G08750	AT2G24460
AT1G52840	AT1G48510	AT2G02930	AT2G16730	AT1G77730	AT1G75590	AT3G09280	AT2G24560
AT1G52960	AT1G48660	AT2G02950	AT2G17040	AT1G78520	AT1G75870	AT3G09960	AT2G24761
AT1G52970	AT1G48930	AT2G03370	AT2G17090	AT1G78530	AT1G75910	AT3G10986	AT2G25482
AT1G53360	AT1G48990	AT2G04047	AT2G18610	AT1G80090	AT1G76135	AT3G11110	AT2G26410
AT1G53420	AT1G49010	AT2G04120	AT2G18800	AT2G01034	AT1G76370	AT3G11300	AT2G26450
AT1G54070	AT1G49390	AT2G04720	AT2G19050	AT2G01610	AT1G76770	AT3G11773	AT2G26490
AT1G54445	AT1G49435	AT2G04810	AT2G19150	AT2G01770	AT1G78160	AT3G12430	AT2G26630
AT1G54640	AT1G49470	AT2G05270	AT2G19190	AT2G02100	AT1G78360	AT3G13090	AT2G26850
AT1G54980	AT1G49830	AT2G05530	AT2G19770	AT2G02120	AT1G78450	AT3G13662	AT2G26940
AT1G55260	AT1G49870	AT2G05635	AT2G20208	AT2G02180	AT1G78460	AT3G14060	AT2G27035
AT1G55450	AT1G50650	AT2G05640	AT2G20465	AT2G02540	AT1G78470	AT3G14225	AT2G27315
AT1G55570	AT1G50732	AT2G05914	AT2G20613	AT2G02700	AT1G78840	AT3G14452	AT2G27360
AT1G55600	AT1G50820	AT2G05915	AT2G20800	AT2G02930	AT1G78970	AT3G14490	AT2G27630
AT1G55720	AT1G51055	AT2G06200	AT2G21020	AT2G03370	AT1G79130	AT3G14880	AT2G27650
AT1G56233	AT1G51405	AT2G06370	AT2G21655	AT2G03710	AT1G79370	AT3G15115	AT2G28085
AT1G56390	AT1G51530	AT2G07664	AT2G21727	AT2G03720	AT1G79760	AT3G15604	AT2G28180
AT1G56400	AT1G51920	AT2G07672	AT2G21730	AT2G04810	AT1G79860	AT3G15650	AT2G29160
AT1G56415	AT1G51930	AT2G07675	AT2G21890	AT2G04820	AT1G79910	AT3G16020	AT2G29320
AT1G56418	AT1G52490	AT2G07718	AT2G21990	AT2G05380	AT1G80330	AT3G16220	AT2G29380
AT1G56480	AT1G52560	AT2G07735	AT2G22055	AT2G05420	AT1G80740	AT3G16555	AT2G29470
AT1G56553	AT1G52615	AT2G07751	AT2G22170	AT2G05490	AT2G01275	AT3G17203	AT2G29605
AT1G56620	AT1G52650	AT2G07757	AT2G22770	AT2G05914	AT2G01560	AT3G17609	AT2G29850
AT1G57565	AT1G52670	AT2G07767	AT2G22820	AT2G05915	AT2G02140	AT3G18280	AT2G30424
AT1G57570	AT1G52770	AT2G07792	AT2G23148	AT2G06200	AT2G02490	AT3G18777	AT2G30766
AT1G57580	AT1G52910	AT2G07809	AT2G23660	AT2G06370	AT2G02498	AT3G19160	AT2G31050
AT1G57780	AT1G53380	AT2G07825	AT2G23960	AT2G06460	AT2G02720	AT3G19600	AT2G31215
AT1G58055	AT1G53520	AT2G10260	AT2G24370	AT2G07664	AT2G03130	AT3G20075	AT2G31425
AT1G58120	AT1G53690	AT2G10600	AT2G24834	AT2G07672	AT2G03160	AT3G20087	AT2G31430
AT1G58122	AT1G53700	AT2G10940	AT2G25185	AT2G07777	AT2G03170	AT3G20450	AT2G31500
AT1G59453	AT1G53920	AT2G10990	AT2G25305	AT2G07809	AT2G03821	AT3G20978	AT2G31590
AT1G59500	AT1G54000	AT2G12040	AT2G25482	AT2G10600	AT2G03933	AT3G21890	AT2G31850
AT1G59670	AT1G54010	AT2G12170	AT2G26120	AT2G10770	AT2G03955	AT3G22231	AT2G32350
AT1G59790	AT1G54730	AT2G12320	AT2G26150	AT2G10780	AT2G04033	AT3G22840	AT2G33100
AT1G59800	AT1G54740	AT2G12430	AT2G26420	AT2G10940	AT2G04034	AT3G23050	AT2G33270
AT1G60400	AT1G54955	AT2G12440	AT2G26865	AT2G12905	AT2G04041	AT3G23120	AT2G33775
AT1G60570	AT1G55360	AT2G12905	AT2G26940	AT2G13175	AT2G04046	AT3G23770	AT2G35180
AT1G60740	AT1G55700	AT2G13128	AT2G26975	AT2G13463	AT2G04220	AT3G25180	AT2G35765
AT1G60983	AT1G55950	AT2G13430	AT2G27080	AT2G14378	AT2G04425	AT3G25265	AT2G36020
AT1G60985	AT1G56170	AT2G13431	AT2G27315	AT2G14670	AT2G05180	AT3G25730	AT2G36110
AT1G60986	AT1G56650	AT2G13450	AT2G27660	AT2G15330	AT2G05190	AT3G26140	AT2G36780
AT1G60987	AT1G57760	AT2G13975	AT2G27935	AT2G15440	AT2G05335	AT3G26610	AT2G38690
AT1G61060	AT1G58010	AT2G14230	AT2G28085	AT2G15610	AT2G05410	AT3G26742	AT2G39530
AT1G61320	AT1G58340	AT2G14320	AT2G28220	AT2G15840	AT2G05540	AT3G27329	AT2G39690
AT1G61330	AT1G58460	AT2G14570	AT2G28420	AT2G16200	AT2G05850	AT3G28315	AT2G40116
AT1G61566	AT1G59700	AT2G14661	AT2G28500	AT2G16210	AT2G06090	AT3G28857	AT2G40390
AT1G61688	AT1G60160	AT2G14670	AT2G28640	AT2G16300	AT2G07040	AT3G28958	AT2G40670
AT1G62660	AT1G60390	AT2G14690	AT2G29150	AT2G16505	AT2G10430	AT3G29034	AT2G40850
AT1G62886	AT1G60470	AT2G15440	AT2G29170	AT2G16580	AT2G11150	AT3G29150	AT2G40990
AT1G63055	AT1G60500	AT2G15770	AT2G29930	AT2G16760	AT2G12020	AT3G29220	AT2G41415
AT1G63057	AT1G60590	AT2G16210	AT2G30760	AT2G16895	AT2G12900	AT3G30418	AT2G41570
AT1G63180	AT1G60630	AT2G16230	AT2G30766	AT2G17050	AT2G12940	AT3G30530	AT2G41860
AT1G63190	AT1G61110	AT2G17305	AT2G30984	AT2G17305	AT2G13115	AT3G31420	AT2G41905
AT1G63205	AT1G61300	AT2G17330	AT2G30985	AT2G17330	AT2G13150	AT3G32047	AT2G43141
AT1G63206	AT1G61920	AT2G17490	AT2G31050	AT2G17470	AT2G13350	AT3G32900	AT2G43230
AT1G63522	AT1G62070	AT2G18150	AT2G31215	AT2G17490	AT2G13570	AT3G42160	AT2G43470
AT1G64030	AT1G62220	AT2G18210	AT2G31430	AT2G17723	AT2G14095	AT3G42190	AT2G44290
AT1G64035	AT1G62225	AT2G18328	AT2G31850	AT2G17850	AT2G14247	AT3G42565	AT2G44380
AT1G64295	AT1G62500	AT2G18540	AT2G32020	AT2G18115	AT2G14560	AT3G43400	AT2G45230
AT1G64830	AT1G62690	AT2G18640	AT2G32905	AT2G18150	AT2G14846	AT3G43635	AT2G45800
AT1G64870	AT1G62870	AT2G19060	AT2G33130	AT2G18540	AT2G15345	AT3G44096	AT2G46300
AT1G64940	AT1G62975	AT2G19070	AT2G33270	AT2G18590	AT2G15555	AT3G44215	AT2G46360
AT1G65300	AT1G63040	AT2G19100	AT2G33710	AT2G18938	AT2G15660	AT3G44450	AT2G46493
AT1G65330	AT1G63100	AT2G19660	AT2G34440	AT2G19060	AT2G15880	AT3G44910	AT2G46640
AT1G65360	AT1G63520	AT2G19850	AT2G34655	AT2G19070	AT2G15960	AT3G45577	AT2G46860
AT1G65610	AT1G64010	AT2G19890	AT2G35250	AT2G19660	AT2G16225	AT3G45638	AT2G47030
AT1G65640	AT1G64240	AT2G19910	AT2G35460	AT2G19820	AT2G16260	AT3G45820	AT2G47040
AT1G65740	AT1G64450	AT2G20750	AT2G35615	AT2G19900	AT2G16670	AT3G46050	AT2G47050
AT1G65750	AT1G64585	AT2G20825	AT2G36180	AT2G19910	AT2G16730	AT3G46270	AT2G47280
AT1G65770	AT1G64800	AT2G21490	AT2G36325	AT2G19920	AT2G17090	AT3G46650	AT2G47340
AT1G65845	AT1G65090	AT2G21750	AT2G36750	AT2G19970	AT2G17430	AT3G46690	AT2G47880
AT1G65890	AT1G65160	AT2G22030	AT2G36780	AT2G20150	AT2G18180	AT3G48290	AT3G01010
AT1G65970	AT1G65190	AT2G22350	AT2G38240	AT2G20298	AT2G18420	AT3G49030	AT3G01030
AT1G65990	AT1G65620	AT2G23190	AT2G38510	AT2G20750	AT2G18470	AT3G49480	AT3G01085
AT1G66000	AT1G65630	AT2G23220	AT2G38540	AT2G20825	AT2G18550	AT3G49860	AT3G01230
AT1G66090	AT1G65710	AT2G23230	AT2G38600	AT2G21030	AT2G18810	AT3G50470	AT3G01240
AT1G66145	AT1G65880	AT2G23330	AT2G38690	AT2G21237	AT2G19000	AT3G50540	AT3G01250
AT1G66210	AT1G65900	AT2G23400	AT2G39530	AT2G21420	AT2G19050	AT3G50610	AT3G01270
AT1G66290	AT1G65910	AT2G23410	AT2G40116	AT2G21490	AT2G19190	AT3G50770	AT3G01700
AT1G66300	AT1G66250	AT2G24010	AT2G40925	AT2G21850	AT2G19220	AT3G53040	AT3G02493
AT1G66310	AT1G66270	AT2G24400	AT2G41240	AT2G22030	AT2G19510	AT3G53235	AT3G02810
AT1G66320	AT1G66390	AT2G24430	AT2G41360	AT2G22590	AT2G19770	AT3G53342	AT3G02970
AT1G66630	AT1G66430	AT2G24735	AT2G41415	AT2G22905	AT2G20208	AT3G53611	AT3G03430
AT1G66640	AT1G66810	AT2G24750	AT2G41850	AT2G23060	AT2G20463	AT3G54510	AT3G03800
AT1G66852	AT1G66850	AT2G24800	AT2G43570	AT2G23190	AT2G20465	AT3G54823	AT3G04110
AT1G66855	AT1G66910	AT2G25015	AT2G43610	AT2G23220	AT2G20870	AT3G55485	AT3G04210
AT1G66870	AT1G66930	AT2G25020	AT2G44330	AT2G23230	AT2G21465	AT3G55860	AT3G04360
AT1G67070	AT1G66940	AT2G25030	AT2G45230	AT2G23330	AT2G21480	AT3G56000	AT3G04700
AT1G67130	AT1G67100	AT2G25060	AT2G46640	AT2G23400	AT2G21655	AT3G57440	AT3G04717
AT1G67270	AT1G67540	AT2G25120	AT2G47200	AT2G23410	AT2G21730	AT3G59440	AT3G05610
AT1G67290	AT1G67710	AT2G25370	AT2G47280	AT2G23510	AT2G21990	AT3G59700	AT3G05725
AT1G67390	AT1G67810	AT2G25470	AT2G47340	AT2G23870	AT2G22055	AT3G59850	AT3G05820
AT1G67450	AT1G67855	AT2G25550	AT3G01185	AT2G24160	AT2G22121	AT3G60090	AT3G06000
AT1G67455	AT1G67856	AT2G25735	AT3G01322	AT2G24580	AT2G22145	AT3G60930	AT3G07005
AT1G67610	AT1G68190	AT2G26820	AT3G01324	AT2G24735	AT2G22180	AT3G61010	AT3G07380
AT1G67623	AT1G68220	AT2G27300	AT3G01327	AT2G24750	AT2G22330	AT3G61030	AT3G07820
AT1G67640	AT1G68480	AT2G27380	AT3G01329	AT2G24761	AT2G22510	AT3G61118	AT3G07850
AT1G67645	AT1G68510	AT2G27420	AT3G01331	AT2G24890	AT2G22980	AT3G61390	AT3G09530
AT1G67760	AT1G68780	AT2G28490	AT3G01870	AT2G25020	AT2G23100	AT3G61940	AT3G10282
AT1G67775	AT1G68795	AT2G28660	AT3G03828	AT2G25030	AT2G23148	AT3G62960	AT3G10460
AT1G67820	AT1G69160	AT2G29045	AT3G03830	AT2G25060	AT2G23160	AT3G63052	AT3G11990
AT1G68210	AT1G69180	AT2G29090	AT3G04410	AT2G25120	AT2G23210	AT3G63350	AT3G12470
AT1G68840	AT1G69910	AT2G29130	AT3G04735	AT2G25150	AT2G23250	AT4G00920	AT3G12840
AT1G68880	AT1G70080	AT2G29270	AT3G05525	AT2G25260	AT2G23770	AT4G01820	AT3G13229
AT1G68905	AT1G70210	AT2G29490	AT3G05620	AT2G25470	AT2G23960	AT4G02555	AT3G13390
AT1G68907	AT1G70470	AT2G29810	AT3G06000	AT2G25550	AT2G24370	AT4G02810	AT3G13400
AT1G69090	AT1G70800	AT2G29850	AT3G07850	AT2G25735	AT2G24450	AT4G04540	AT3G13500
AT1G69190	AT1G71120	AT2G29880	AT3G09162	AT2G25980	AT2G24460	AT4G04900	AT3G14040
AT1G69260	AT1G71160	AT2G30300	AT3G09330	AT2G26040	AT2G24693	AT4G05495	AT3G14185
AT1G69818	AT1G71250	AT2G31230	AT3G09870	AT2G26820	AT2G24870	AT4G05540	AT3G15670
AT1G69825	AT1G71520	AT2G31480	AT3G10930	AT2G27380	AT2G25185	AT4G06620	AT3G15800
AT1G69828	AT1G72150	AT2G31520	AT3G11990	AT2G28315	AT2G25295	AT4G06641	AT3G16600
AT1G69940	AT1G72210	AT2G31620	AT3G12470	AT2G28490	AT2G25305	AT4G07526	AT3G16750
AT1G70040	AT1G72430	AT2G31625	AT3G12840	AT2G29060	AT2G25630	AT4G08870	AT3G17010
AT1G70170	AT1G72600	AT2G31930	AT3G12900	AT2G29120	AT2G26410	AT4G09380	AT3G17060
AT1G70640	AT1G72610	AT2G31980	AT3G13500	AT2G29125	AT2G26490	AT4G09462	AT3G17140
AT1G71150	AT1G72645	AT2G32100	AT3G14040	AT2G29270	AT2G26630	AT4G09795	AT3G17980
AT1G71280	AT1G72670	AT2G32990	AT3G14185	AT2G29280	AT2G26850	AT4G10250	AT3G18220
AT1G71290	AT1G73270	AT2G33205	AT3G16580	AT2G29290	AT2G26865	AT4G10290	AT3G18485
AT1G71320	AT1G73965	AT2G33385	AT3G16970	AT2G29460	AT2G26940	AT4G10655	AT3G18810
AT1G71370	AT1G74130	AT2G33400	AT3G17010	AT2G29800	AT2G26950	AT4G10740	AT3G18955
AT1G72000	AT1G74890	AT2G33796	AT3G17060	AT2G29880	AT2G26975	AT4G11580	AT3G19070
AT1G72080	AT1G74960	AT2G34060	AT3G17080	AT2G30540	AT2G27270	AT4G11900	AT3G19310
AT1G72460	AT1G75050	AT2G34080	AT3G17140	AT2G30590	AT2G27315	AT4G12150	AT3G19560
AT1G72580	AT1G75120	AT2G34186	AT3G17150	AT2G30680	AT2G27320	AT4G12480	AT3G19890
AT1G72980	AT1G75240	AT2G34315	AT3G17152	AT2G31230	AT2G27830	AT4G12490	AT3G20220
AT1G73120	AT1G75640	AT2G34740	AT3G17230	AT2G31480	AT2G27935	AT4G12730	AT3G20530
AT1G73550	AT1G75940	AT2G34940	AT3G18220	AT2G31520	AT2G27936	AT4G12820	AT3G20580
AT1G73560	AT1G76310	AT2G34960	AT3G18955	AT2G31620	AT2G28180	AT4G13210	AT3G20865
AT1G73603	AT1G76420	AT2G35270	AT3G19070	AT2G31625	AT2G29320	AT4G13575	AT3G20997
AT1G73607	AT1G76470	AT2G35380	AT3G20520	AT2G31770	AT2G29470	AT4G13965	AT3G21180
AT1G73610	AT1G76500	AT2G35382	AT3G20850	AT2G31980	AT2G29605	AT4G13968	AT3G21570
AT1G74000	AT1G76520	AT2G35384	AT3G20865	AT2G32100	AT2G30090	AT4G14080	AT3G21660
AT1G74010	AT1G77100	AT2G36402	AT3G20880	AT2G32540	AT2G30766	AT4G14550	AT3G22120
AT1G74110	AT1G77200	AT2G36610	AT3G20997	AT2G32990	AT2G30810	AT4G15150	AT3G22142
AT1G74870	AT1G77580	AT2G36640	AT3G21730	AT2G33020	AT2G31035	AT4G15300	AT3G22492
AT1G75600	AT1G78206	AT2G37090	AT3G21805	AT2G33205	AT2G31050	AT4G15920	AT3G22800
AT1G75610	AT1G78260	AT2G37100	AT3G21937	AT2G33233	AT2G31425	AT4G16015	AT3G23510
AT1G75620	AT1G78370	AT2G38380	AT3G22275	AT2G33400	AT2G31430	AT4G16030	AT3G24310
AT1G75870	AT1G78430	AT2G38750	AT3G22492	AT2G33796	AT2G31500	AT4G16550	AT3G24620
AT1G75900	AT1G78520	AT2G38870	AT3G22510	AT2G34060	AT2G31850	AT4G18180	AT3G25165
AT1G76370	AT1G78860	AT2G38890	AT3G23010	AT2G34080	AT2G31865	AT4G18550	AT3G25170
AT1G76720	AT1G78865	AT2G38920	AT3G24310	AT2G34100	AT2G33080	AT4G19430	AT3G25450
AT1G76830	AT1G79420	AT2G41280	AT3G24612	AT2G34190	AT2G33100	AT4G19810	AT3G26110
AT1G76930	AT1G79580	AT2G41590	AT3G25550	AT2G34315	AT2G33160	AT4G19930	AT3G26220
AT1G77093	AT1G80080	AT2G41730	AT3G25950	AT2G34710	AT2G33710	AT4G20470	AT3G26550
AT1G77525	AT1G80090	AT2G42110	AT3G26450	AT2G34925	AT2G33720	AT4G20510	AT3G26612
AT1G77640	AT1G80280	AT2G42150	AT3G26460	AT2G34960	AT2G33775	AT4G21050	AT3G26660
AT1G77650	AT1G80690	AT2G42430	AT3G26550	AT2G35387	AT2G34440	AT4G22630	AT3G26860
AT1G77780	AT2G01210	AT2G42560	AT3G26660	AT2G36640	AT2G34500	AT4G23600	AT3G26934
AT1G77830	AT2G01422	AT2G42800	AT3G27425	AT2G36890	AT2G34990	AT4G23870	AT3G27040
AT1G77932	AT2G01610	AT2G43138	AT3G27500	AT2G37090	AT2G35250	AT4G24265	AT3G27450
AT1G78160	AT2G01770	AT2G43220	AT3G27510	AT2G37100	AT2G35460	AT4G24300	AT3G27510
AT1G78220	AT2G01918	AT2G43520	AT3G27680	AT2G37390	AT2G35615	AT4G25010	AT3G28153
AT1G78460	AT2G01940	AT2G43580	AT3G27940	AT2G37810	AT2G35765	AT4G25420	AT3G28410
AT1G78470	AT2G01950	AT2G43870	AT3G28243	AT2G38120	AT2G36020	AT4G25433	AT3G28470
AT1G78720	AT2G01990	AT2G44790	AT3G28320	AT2G38750	AT2G36120	AT4G25560	AT3G28750
AT1G78780	AT2G02030	AT2G45450	AT3G28410	AT2G38760	AT2G36295	AT4G26050	AT3G28780
AT1G78840	AT2G02100	AT2G45570	AT3G28510	AT2G38870	AT2G36690	AT4G26330	AT3G28790
AT1G79130	AT2G02120	AT2G45780	AT3G29050	AT2G38890	AT2G36695	AT4G26340	AT3G28810
AT1G79370	AT2G02180	AT2G45830	AT3G29060	AT2G38920	AT2G37430	AT4G26530	AT3G28820
AT1G79860	AT2G02200	AT2G45890	AT3G29250	AT2G38995	AT2G37720	AT4G27140	AT3G28830
AT1G80220	AT2G02210	AT2G46530	AT3G29783	AT2G39690	AT2G38255	AT4G27160	AT3G28840
AT1G80470	AT2G02450	AT2G46770	AT3G31945	AT2G41280	AT2G38600	AT4G27810	AT3G28980
AT1G80740	AT2G02480	AT3G01190	AT3G33189	AT2G41480	AT2G38790	AT4G27930	AT3G29050
AT2G01240	AT2G02540	AT3G01516	AT3G42450	AT2G41640	AT2G39210	AT4G28520	AT3G29060
AT2G01370	AT2G02930	AT3G01550	AT3G42473	AT2G41820	AT2G39410	AT4G28620	AT3G29250
AT2G01520	AT2G03370	AT3G01570	AT3G42880	AT2G42110	AT2G40180	AT4G28700	AT3G29410
AT2G01560	AT2G03550	AT3G02100	AT3G43630	AT2G42150	AT2G40210	AT4G28890	AT3G29430
AT2G01810	AT2G03590	AT3G02150	AT3G43660	AT2G42430	AT2G40390	AT4G29050	AT3G29670
AT2G01880	AT2G03710	AT3G02590	AT3G43710	AT2G42560	AT2G40745	AT4G29200	AT3G30805
AT2G02000	AT2G03750	AT3G03510	AT3G43860	AT2G42800	AT2G40850	AT4G30300	AT3G30812
AT2G02140	AT2G04170	AT3G03620	AT3G43990	AT2G43520	AT2G40990	AT4G31740	AT3G31980
AT2G02147	AT2G04500	AT3G03730	AT3G44260	AT2G43870	AT2G40995	AT4G32170	AT3G42450
AT2G02290	AT2G04970	AT3G04250	AT3G44274	AT2G44250	AT2G41451	AT4G32375	AT3G42880
AT2G02490	AT2G05070	AT3G05152	AT3G44425	AT2G44910	AT2G41580	AT4G32950	AT3G43120
AT2G02498	AT2G05350	AT3G05300	AT3G44650	AT2G45420	AT2G41860	AT4G33290	AT3G43530
AT2G02515	AT2G05370	AT3G06070	AT3G44810	AT2G45430	AT2G41905	AT4G34170	AT3G43829
AT2G02520	AT2G05635	AT3G06433	AT3G45280	AT2G45450	AT2G42540	AT4G34520	AT3G43860
AT2G02660	AT2G05640	AT3G06490	AT3G45530	AT2G45570	AT2G43140	AT4G35350	AT3G44240
AT2G02890	AT2G05642	AT3G06900	AT3G45550	AT2G45830	AT2G43230	AT4G35720	AT3G44550
AT2G03040	AT2G05786	AT3G07830	AT3G45580	AT2G45890	AT2G43570	AT4G36160	AT3G44650
AT2G03130	AT2G05914	AT3G08900	AT3G45670	AT2G46120	AT2G44330	AT4G36670	AT3G44810
AT2G03160	AT2G05915	AT3G09020	AT3G45760	AT2G46440	AT2G44380	AT4G37295	AT3G45070
AT2G03190	AT2G06200	AT3G09940	AT3G46070	AT2G46530	AT2G44460	AT4G37970	AT3G45180
AT2G03290	AT2G06440	AT3G09960	AT3G46080	AT2G47430	AT2G44540	AT4G39810	AT3G45200
AT2G03560	AT2G06950	AT3G10986	AT3G46090	AT3G01190	AT2G44550	AT4G39925	AT3G45280
AT2G03770	AT2G10260	AT3G11180	AT3G46280	AT3G01345	AT2G44990	AT4G40085	AT3G45580
AT2G03900	AT2G10940	AT3G12000	AT3G46310	AT3G01570	AT2G45110	AT5G01360	AT3G45650
AT2G03931	AT2G11340	AT3G12710	AT3G46750	AT3G02590	AT2G45760	AT5G01900	AT3G45700
AT2G03933	AT2G11410	AT3G12880	AT3G46840	AT3G02640	AT2G45800	AT5G02244	AT3G45760
AT2G03955	AT2G11465	AT3G13175	AT3G46850	AT3G03620	AT2G46360	AT5G03260	AT3G45940
AT2G04033	AT2G11480	AT3G14060	AT3G47050	AT3G03726	AT2G46640	AT5G03360	AT3G46090
AT2G04034	AT2G12280	AT3G14452	AT3G47090	AT3G03730	AT2G46860	AT5G06470	AT3G46487
AT2G04045	AT2G12646	AT3G15115	AT3G48208	AT3G04990	AT2G47030	AT5G09750	AT3G46730
AT2G04046	AT2G13820	AT3G15604	AT3G48340	AT3G06868	AT2G47040	AT5G10235	AT3G47090
AT2G04135	AT2G14140	AT3G15670	AT3G48450	AT3G06870	AT2G47050	AT5G10760	AT3G47340
AT2G04425	AT2G14378	AT3G15910	AT3G48520	AT3G06890	AT2G47190	AT5G11610	AT3G47790
AT2G04460	AT2G14520	AT3G16020	AT3G50030	AT3G06895	AT2G47200	AT5G12300	AT3G48010
AT2G04570	AT2G14690	AT3G16070	AT3G50640	AT3G06900	AT2G47340	AT5G12870	AT3G48450
AT2G04730	AT2G14935	AT3G16555	AT3G51680	AT3G07620	AT3G01030	AT5G13225	AT3G48520
AT2G04910	AT2G15220	AT3G17609	AT3G52600	AT3G07830	AT3G01085	AT5G13620	AT3G48650
AT2G04920	AT2G15440	AT3G17640	AT3G52748	AT3G07900	AT3G01185	AT5G13887	AT3G49540
AT2G04925	AT2G16210	AT3G18180	AT3G53960	AT3G08750	AT3G01230	AT5G14340	AT3G52000
AT2G05190	AT2G16230	AT3G18260	AT3G54580	AT3G08900	AT3G01240	AT5G16570	AT3G52010
AT2G05335	AT2G16270	AT3G18280	AT3G54700	AT3G09280	AT3G01250	AT5G17480	AT3G52460
AT2G05410	AT2G16575	AT3G18320	AT3G54925	AT3G09940	AT3G01270	AT5G17800	AT3G52600
AT2G05520	AT2G16580	AT3G18360	AT3G55110	AT3G09960	AT3G01290	AT5G17820	AT3G52620
AT2G05850	AT2G16595	AT3G19940	AT3G55230	AT3G10000	AT3G01322	AT5G19870	AT3G54410
AT2G05970	AT2G16760	AT3G20075	AT3G55665	AT3G10185	AT3G01323	AT5G20760	AT3G54730
AT2G06090	AT2G16850	AT3G20130	AT3G55672	AT3G11180	AT3G01324	AT5G22910	AT3G54800
AT2G07040	AT2G16910	AT3G20450	AT3G55677	AT3G12000	AT3G01325	AT5G23820	AT3G55190
AT2G07130	AT2G17450	AT3G20900	AT3G55890	AT3G12203	AT3G01326	AT5G24090	AT3G55890
AT2G10430	AT2G17490	AT3G21020	AT3G56970	AT3G12870	AT3G01327	AT5G25370	AT3G56180
AT2G11150	AT2G17620	AT3G21550	AT3G56980	AT3G12880	AT3G01329	AT5G26260	AT3G56790
AT2G12190	AT2G17850	AT3G21660	AT3G57210	AT3G12960	AT3G01331	AT5G26300	AT3G56970
AT2G12465	AT2G18150	AT3G21755	AT3G57260	AT3G13175	AT3G01700	AT5G27945	AT3G56980
AT2G12940	AT2G18540	AT3G21760	AT3G57690	AT3G13228	AT3G01880	AT5G28510	AT3G57640
AT2G13115	AT2G18590	AT3G22570	AT3G58000	AT3G13825	AT3G02810	AT5G33303	AT3G57690
AT2G13150	AT2G18640	AT3G22640	AT3G58165	AT3G14225	AT3G02970	AT5G35932	AT3G58060
AT2G13160	AT2G18830	AT3G22800	AT3G58860	AT3G14452	AT3G03430	AT5G35935	AT3G58250
AT2G13295	AT2G19060	AT3G22830	AT3G59220	AT3G15115	AT3G03800	AT5G36310	AT3G59250
AT2G13350	AT2G19070	AT3G23090	AT3G59250	AT3G15670	AT3G03828	AT5G36330	AT3G59830
AT2G14247	AT2G19100	AT3G23167	AT3G59480	AT3G16020	AT3G04100	AT5G36340	AT3G60570
AT2G14540	AT2G19450	AT3G23350	AT3G60176	AT3G16070	AT3G04210	AT5G36360	AT3G60610
AT2G14700	AT2G19650	AT3G23360	AT3G60570	AT3G16300	AT3G04540	AT5G36910	AT3G61160
AT2G14846	AT2G19660	AT3G23470	AT3G60790	AT3G17609	AT3G04700	AT5G37478	AT3G61185
AT2G15260	AT2G19910	AT3G24093	AT3G61040	AT3G17640	AT3G04735	AT5G37485	AT3G61190
AT2G15327	AT2G19920	AT3G24600	AT3G61111	AT3G18180	AT3G04900	AT5G37665	AT3G62170
AT2G15340	AT2G20515	AT3G25190	AT3G61185	AT3G18280	AT3G05460	AT5G37730	AT3G62180
AT2G15345	AT2G20562	AT3G25265	AT3G61190	AT3G18660	AT3G05610	AT5G37950	AT3G62230
AT2G15660	AT2G20570	AT3G25730	AT3G61250	AT3G19270	AT3G05725	AT5G37980	AT3G62640
AT2G15740	AT2G20750	AT3G26300	AT3G61290	AT3G19850	AT3G06000	AT5G38010	AT3G62710
AT2G15930	AT2G20825	AT3G26620	AT3G62210	AT3G20130	AT3G06145	AT5G38020	AT3G62950
AT2G16220	AT2G21650	AT3G26742	AT3G62480	AT3G20140	AT3G06260	AT5G38190	AT4G00140
AT2G16225	AT2G21740	AT3G27329	AT3G62640	AT3G20450	AT3G07380	AT5G38680	AT4G01910
AT2G16290	AT2G21750	AT3G28155	AT4G01240	AT3G20557	AT3G07820	AT5G38980	AT4G02250
AT2G16300	AT2G21850	AT3G28280	AT4G02300	AT3G20590	AT3G07850	AT5G39200	AT4G02312
AT2G16310	AT2G22000	AT3G28315	AT4G03295	AT3G20935	AT3G09330	AT5G40010	AT4G02314
AT2G16670	AT2G22030	AT3G28945	AT4G03437	AT3G20978	AT3G09340	AT5G40020	AT4G02650
AT2G16730	AT2G22350	AT3G29190	AT4G04655	AT3G21020	AT3G09530	AT5G41500	AT4G03290
AT2G16960	AT2G22590	AT3G29205	AT4G04980	AT3G21550	AT3G09990	AT5G41761	AT4G03292
AT2G17090	AT2G22710	AT3G29470	AT4G05250	AT3G21620	AT3G10195	AT5G41900	AT4G03470
AT2G17500	AT2G22840	AT3G29510	AT4G08028	AT3G21755	AT3G10595	AT5G42146	AT4G04077
AT2G18180	AT2G23060	AT3G29633	AT4G08160	AT3G21760	AT3G10600	AT5G42580	AT4G04130
AT2G18420	AT2G23190	AT3G29634	AT4G08720	AT3G21770	AT3G10900	AT5G43030	AT4G04655
AT2G18470	AT2G23220	AT3G29767	AT4G08995	AT3G21800	AT3G10974	AT5G43200	AT4G04710
AT2G18490	AT2G23230	AT3G29770	AT4G09153	AT3G21910	AT3G11990	AT5G43380	AT4G04930
AT2G18610	AT2G23330	AT3G30280	AT4G09230	AT3G21940	AT3G12190	AT5G43390	AT4G04980
AT2G18720	AT2G23400	AT3G30290	AT4G09360	AT3G22640	AT3G12420	AT5G44130	AT4G05170
AT2G18800	AT2G23410	AT3G30695	AT4G09450	AT3G22800	AT3G12977	AT5G44390	AT4G05340
AT2G18810	AT2G23510	AT3G30720	AT4G10210	AT3G23090	AT3G13229	AT5G44410	AT4G07523
AT2G18820	AT2G24010	AT3G30803	AT4G10613	AT3G23165	AT3G13390	AT5G44568	AT4G08115
AT2G18870	AT2G24160	AT3G30833	AT4G10695	AT3G23167	AT3G13400	AT5G45210	AT4G08290
AT2G18880	AT2G24210	AT3G31402	AT4G10740	AT3G23350	AT3G13760	AT5G45530	AT4G08800
AT2G19150	AT2G24430	AT3G31900	AT4G11050	AT3G23360	AT3G13820	AT5G45960	AT4G08995
AT2G19190	AT2G24580	AT3G32047	AT4G11280	AT3G23470	AT3G14040	AT5G46050	AT4G09450
AT2G19220	AT2G24610	AT3G33235	AT4G11310	AT3G24400	AT3G14850	AT5G46295	AT4G09731
AT2G19230	AT2G24700	AT3G33377	AT4G11580	AT3G24600	AT3G16960	AT5G46320	AT4G10010
AT2G19500	AT2G24800	AT3G34299	AT4G11940	AT3G24610	AT3G16970	AT5G53190	AT4G10613
AT2G19510	AT2G25015	AT3G42160	AT4G12580	AT3G25620	AT3G17060	AT5G53635	AT4G10690
AT2G19803	AT2G25020	AT3G42725	AT4G12860	AT3G25826	AT3G17140	AT5G58260	AT4G11000
AT2G19970	AT2G25025	AT3G43110	AT4G12900	AT3G26140	AT3G17150	AT5G58400	AT4G11070
AT2G20080	AT2G25030	AT3G43303	AT4G12917	AT3G26200	AT3G17152	AT5G59080	AT4G11200
AT2G20160	AT2G25060	AT3G43307	AT4G13075	AT3G26290	AT3G17980	AT5G60490	AT4G11310
AT2G20170	AT2G25130	AT3G43315	AT4G13090	AT3G26300	AT3G18220	AT5G60560	AT4G12090
AT2G20208	AT2G25150	AT3G43640	AT4G13263	AT3G26330	AT3G18362	AT5G61997	AT4G12917
AT2G20463	AT2G25260	AT3G43654	AT4G13395	AT3G26742	AT3G18810	AT5G62100	AT4G13075
AT2G20465	AT2G25270	AT3G43960	AT4G13420	AT3G26820	AT3G19310	AT5G62780	AT4G13240
AT2G20595	AT2G25680	AT3G44215	AT4G13480	AT3G27329	AT3G19350	AT5G63063	AT4G13263
AT2G20597	AT2G25735	AT3G44460	AT4G13490	AT3G28150	AT3G19560	AT5G63450	AT4G13490
AT2G20605	AT2G25940	AT3G44713	AT4G13560	AT3G28220	AT3G20220	AT5G64450	AT4G13554
AT2G20619	AT2G25980	AT3G44830	AT4G13810	AT3G28315	AT3G20362	AT5G64770	AT4G13560
AT2G21110	AT2G26040	AT3G44950	AT4G13955	AT3G28630	AT3G20530	AT5G66890	AT4G15258
AT2G21235	AT2G26070	AT3G45070	AT4G14272	AT3G28857	AT3G20580	AT5G67450	AT4G15650
AT2G21465	AT2G26180	AT3G45080	AT4G14560	AT3G28955	AT3G20865		AT4G15700
AT2G21480	AT2G26400	AT3G45120	AT4G14750	AT3G29150	AT3G21180		AT4G15710
AT2G21840	AT2G26440	AT3G45130	AT4G14980	AT3G29190	AT3G21570		AT4G16000
AT2G21990	AT2G26650	AT3G45610	AT4G15056	AT3G29767	AT3G22500		AT4G16008
AT2G22055	AT2G27250	AT3G45780	AT4G15248	AT3G29770	AT3G23727		AT4G17713
AT2G22121	AT2G27300	AT3G46240	AT4G15650	AT3G30450	AT3G24065		AT4G17718
AT2G22180	AT2G27380	AT3G46614	AT4G16000	AT3G30720	AT3G24510		AT4G18090
AT2G23100	AT2G27402	AT3G46690	AT4G16165	AT3G30833	AT3G24982		AT4G18596
AT2G23148	AT2G27670	AT3G46810	AT4G16195	AT3G31402	AT3G25165		AT4G19395
AT2G23210	AT2G28070	AT3G46890	AT4G16220	AT3G33072	AT3G25170		AT4G20240
AT2G23250	AT2G28260	AT3G47100	AT4G16240	AT3G42130	AT3G25240		AT4G20365
AT2G23880	AT2G28410	AT3G47190	AT4G16515	AT3G42190	AT3G25420		AT4G20650
AT2G23900	AT2G28490	AT3G47410	AT4G17565	AT3G42725	AT3G25450		AT4G22020
AT2G23970	AT2G28510	AT3G47870	AT4G17700	AT3G43790	AT3G25570		AT4G22450
AT2G23990	AT2G28620	AT3G47965	AT4G17713	AT3G43960	AT3G25572		AT4G22470
AT2G24370	AT2G28630	AT3G48205	AT4G17718	AT3G44460	AT3G25770		AT4G23220
AT2G24450	AT2G28660	AT3G48235	AT4G17860	AT3G44830	AT3G25950		AT4G23250
AT2G24693	AT2G29045	AT3G48346	AT4G18195	AT3G44950	AT3G26110		AT4G23680
AT2G24696	AT2G29060	AT3G48400	AT4G18740	AT3G45130	AT3G26350		AT4G23880
AT2G24740	AT2G29125	AT3G48510	AT4G20000	AT3G45248	AT3G26550		AT4G24231
AT2G24810	AT2G29460	AT3G49150	AT4G20240	AT3G45250	AT3G26612		AT4G24310
AT2G24840	AT2G29980	AT3G49260	AT4G20365	AT3G45252	AT3G26860		AT4G24640
AT2G24870	AT2G30340	AT3G49480	AT4G20490	AT3G45430	AT3G26934		AT4G25490
AT2G24880	AT2G30380	AT3G49551	AT4G21200	AT3G45610	AT3G26940		AT4G25590
AT2G25120	AT2G30424	AT3G49950	AT4G21780	AT3G45780	AT3G27070		AT4G27150
AT2G25185	AT2G30590	AT3G50120	AT4G21970	AT3G46050	AT3G27425		AT4G27330
AT2G25295	AT2G30680	AT3G50220	AT4G22020	AT3G46240	AT3G27450		AT4G27580
AT2G25305	AT2G30820	AT3G50470	AT4G22470	AT3G46614	AT3G27650		AT4G27790
AT2G25482	AT2G30840	AT3G50970	AT4G22666	AT3G46690	AT3G27680		AT4G28460
AT2G25630	AT2G31020	AT3G51075	AT4G23080	AT3G46810	AT3G27910		AT4G29460
AT2G25685	AT2G31180	AT3G51230	AT4G23220	AT3G46890	AT3G27940		AT4G29658
AT2G25687	AT2G31480	AT3G51420	AT4G23230	AT3G47190	AT3G27999		AT4G29905
AT2G25700	AT2G31520	AT3G52310	AT4G23250	AT3G47410	AT3G28070		AT4G30074
AT2G26050	AT2G31980	AT3G52910	AT4G23350	AT3G47570	AT3G28243		AT4G30140
AT2G26320	AT2G32010	AT3G52970	AT4G23360	AT3G47965	AT3G28250		AT4G30410
AT2G26850	AT2G32100	AT3G53210	AT4G23493	AT3G48205	AT3G28270		AT4G31690
AT2G26865	AT2G32460	AT3G54510	AT4G23520	AT3G48510	AT3G28380		AT4G32510
AT2G26940	AT2G32990	AT3G54823	AT4G23700	AT3G49070	AT3G28750		AT4G33230
AT2G26950	AT2G33030	AT3G55100	AT4G23780	AT3G49260	AT3G28780		AT4G33860
AT2G26975	AT2G33205	AT3G55210	AT4G23880	AT3G49480	AT3G28790		AT4G33960
AT2G27280	AT2G33330	AT3G55240	AT4G23970	AT3G49750	AT3G28810		AT4G34380
AT2G27315	AT2G33400	AT3G55485	AT4G24180	AT3G49950	AT3G28820		AT4G34410
AT2G27320	AT2G33850	AT3G55566	AT4G24231	AT3G50220	AT3G28830		AT4G35010
AT2G27535	AT2G33880	AT3G55646	AT4G24310	AT3G50470	AT3G28980		AT4G35610
AT2G27660	AT2G34020	AT3G55780	AT4G24570	AT3G50610	AT3G29050		AT4G35700
AT2G27700	AT2G34060	AT3G56280	AT4G24640	AT3G50750	AT3G29060		AT4G36060
AT2G27930	AT2G34190	AT3G56660	AT4G24890	AT3G50970	AT3G29250		AT4G36490
AT2G27935	AT2G34315	AT3G56705	AT4G25470	AT3G51230	AT3G29430		AT4G37225
AT2G27936	AT2G34510	AT3G57370	AT4G25490	AT3G51420	AT3G29570		AT4G37409
AT2G28010	AT2G34700	AT3G57440	AT4G25820	AT3G51810	AT3G29572		AT4G37410
AT2G28040	AT2G34710	AT3G57645	AT4G25885	AT3G51930	AT3G29670		AT4G37990
AT2G28340	AT2G34870	AT3G58740	AT4G27110	AT3G52770	AT3G30700		AT4G38190
AT2G28640	AT2G34960	AT3G59700	AT4G27220	AT3G52910	AT3G30844		AT4G39110
AT2G28690	AT2G35075	AT3G59845	AT4G27657	AT3G52970	AT3G32920		AT4G39610
AT2G29470	AT2G35270	AT3G59850	AT4G27920	AT3G53210	AT3G42450		AT4G39700
AT2G29605	AT2G35600	AT3G60000	AT4G28900	AT3G54510	AT3G42880		AT5G01550
AT2G29750	AT2G36145	AT3G60270	AT4G29035	AT3G55100	AT3G43120		AT5G02110
AT2G29840	AT2G36260	AT3G60286	AT4G29285	AT3G55485	AT3G43200		AT5G02900
AT2G29850	AT2G36400	AT3G60490	AT4G29460	AT3G55646	AT3G43250		AT5G03204
AT2G30090	AT2G36402	AT3G60930	AT4G29690	AT3G56390	AT3G43530		AT5G04150
AT2G30690	AT2G36550	AT3G60965	AT4G29905	AT3G57440	AT3G43660		AT5G04350
AT2G30730	AT2G36570	AT3G60972	AT4G30064	AT3G57645	AT3G43860		AT5G04730
AT2G30766	AT2G36610	AT3G61010	AT4G30074	AT3G58360	AT3G44274		AT5G07410
AT2G30810	AT2G36640	AT3G61020	AT4G30410	AT3G58650	AT3G44760		AT5G07420
AT2G30900	AT2G36650	AT3G61028	AT4G31380	AT3G58740	AT3G44810		AT5G07430
AT2G30984	AT2G36890	AT3G61118	AT4G32090	AT3G58910	AT3G45093		AT5G07475
AT2G30985	AT2G37025	AT3G61390	AT4G32105	AT3G59460	AT3G45180		AT5G07570
AT2G31050	AT2G37090	AT3G61680	AT4G32212	AT3G59510	AT3G45200		AT5G07930
AT2G31430	AT2G37100	AT3G61930	AT4G32380	AT3G59850	AT3G45243		AT5G09550
AT2G31470	AT2G37380	AT3G62440	AT4G32630	AT3G60000	AT3G45280		AT5G10500
AT2G31500	AT2G37390	AT3G62510	AT4G33220	AT3G60490	AT3G45550		AT5G11420
AT2G31760	AT2G37590	AT3G62550	AT4G33830	AT3G60930	AT3G45555		AT5G12000
AT2G31780	AT2G38120	AT3G62760	AT4G33840	AT3G60955	AT3G45580		AT5G12180
AT2G31850	AT2G38760	AT3G63040	AT4G33860	AT3G61118	AT3G45670		AT5G13350
AT2G31860	AT2G38870	AT3G63052	AT4G33930	AT3G61220	AT3G45760		AT5G13380
AT2G32275	AT2G38890	AT4G00700	AT4G33960	AT3G61330	AT3G45940		AT5G13900
AT2G32770	AT2G38920	AT4G01450	AT4G34580	AT3G61680	AT3G46090		AT5G13990
AT2G33160	AT2G39180	AT4G01760	AT4G35610	AT3G61930	AT3G46280		AT5G14380
AT2G33420	AT2G39560	AT4G02655	AT4G35770	AT3G63040	AT3G46310		AT5G15110
AT2G33710	AT2G39700	AT4G03050	AT4G36105	AT3G63052	AT3G46370		AT5G15140
AT2G33720	AT2G40230	AT4G03450	AT4G36430	AT4G00165	AT3G46750		AT5G15250
AT2G33775	AT2G40670	AT4G03670	AT4G36620	AT4G00460	AT3G46840		AT5G15995
AT2G33780	AT2G40890	AT4G03965	AT4G37230	AT4G00700	AT3G46850		AT5G16500
AT2G34130	AT2G41070	AT4G04450	AT4G37770	AT4G00872	AT3G46860		AT5G17200
AT2G34210	AT2G41300	AT4G04530	AT4G37800	AT4G00920	AT3G47340		AT5G18202
AT2G34370	AT2G41540	AT4G04590	AT4G37990	AT4G01110	AT3G47790		AT5G18403
AT2G34440	AT2G41590	AT4G05200	AT4G38400	AT4G01160	AT3G48130		AT5G18600
AT2G34555	AT2G41820	AT4G05585	AT4G38770	AT4G01265	AT3G48208		AT5G18910
AT2G34580	AT2G42110	AT4G06477	AT4G38820	AT4G01720	AT3G48340		AT5G19260
AT2G34990	AT2G42150	AT4G06641	AT4G38825	AT4G01770	AT3G48450		AT5G19360
AT2G35000	AT2G42380	AT4G06702	AT4G39070	AT4G01910	AT3G48640		AT5G19473
AT2G35070	AT2G42430	AT4G06748	AT4G39320	AT4G03050	AT3G48650		AT5G20390
AT2G35250	AT2G42800	AT4G07526	AT4G39610	AT4G03270	AT3G48850		AT5G21005
AT2G35460	AT2G42870	AT4G07846	AT5G01550	AT4G03480	AT3G49120		AT5G22545
AT2G35570	AT2G42990	AT4G07850	AT5G02170	AT4G03750	AT3G49200		AT5G22680
AT2G36020	AT2G43050	AT4G08076	AT5G02180	AT4G03965	AT3G49540		AT5G23160
AT2G36325	AT2G43520	AT4G08100	AT5G02190	AT4G04530	AT3G49580		AT5G23270
AT2G36560	AT2G43800	AT4G08112	AT5G02900	AT4G06477	AT3G50020		AT5G24065
AT2G36690	AT2G43860	AT4G08190	AT5G03590	AT4G08290	AT3G50480		AT5G24105
AT2G36695	AT2G43870	AT4G08430	AT5G04150	AT4G09600	AT3G50720		AT5G24210
AT2G36724	AT2G43880	AT4G08450	AT5G04730	AT4G09770	AT3G51700		AT5G24370
AT2G37370	AT2G44910	AT4G08570	AT5G05290	AT4G09795	AT3G52010		AT5G24940
AT2G37430	AT2G45080	AT4G08991	AT5G05530	AT4G10020	AT3G52460		AT5G25250
AT2G37540	AT2G45420	AT4G09143	AT5G05598	AT4G10250	AT3G52600		AT5G25600
AT2G37720	AT2G45430	AT4G09420	AT5G07000	AT4G10490	AT3G52620		AT5G25960
AT2G38152	AT2G45450	AT4G10020	AT5G09280	AT4G10655	AT3G52720		AT5G26060
AT2G38220	AT2G45570	AT4G10490	AT5G09710	AT4G10740	AT3G52790		AT5G26582
AT2G38255	AT2G45580	AT4G10560	AT5G09711	AT4G11040	AT3G54310		AT5G26692
AT2G38540	AT2G45610	AT4G10655	AT5G10500	AT4G11300	AT3G54580		AT5G26717
AT2G38600	AT2G45830	AT4G10660	AT5G11050	AT4G11330	AT3G54700		AT5G26840
AT2G39200	AT2G45890	AT4G11460	AT5G11180	AT4G11550	AT3G54800		AT5G27190
AT2G39210	AT2G45900	AT4G11550	AT5G11540	AT4G11580	AT3G54925		AT5G27870
AT2G39240	AT2G46070	AT4G11900	AT5G11820	AT4G11720	AT3G55190		AT5G27925
AT2G39330	AT2G46440	AT4G11910	AT5G11940	AT4G12280	AT3G55230		AT5G28145
AT2G39410	AT2G46450	AT4G12735	AT5G12060	AT4G12820	AT3G55252		AT5G28470
AT2G39640	AT2G46530	AT4G13210	AT5G13380	AT4G12825	AT3G55254		AT5G28680
AT2G39975	AT2G47500	AT4G13290	AT5G13900	AT4G12950	AT3G55258		AT5G28690
AT2G40210	AT2G47520	AT4G14080	AT5G14400	AT4G13210	AT3G55566		AT5G32433
AT2G40580	AT2G47920	AT4G14301	AT5G14920	AT4G13290	AT3G55665		AT5G32481
AT2G40990	AT2G47930	AT4G14548	AT5G15110	AT4G13575	AT3G55672		AT5G32483
AT2G40995	AT3G01190	AT4G14940	AT5G15140	AT4G13760	AT3G55677		AT5G32540
AT2G41445	AT3G01516	AT4G15150	AT5G15780	AT4G13965	AT3G55680		AT5G34900
AT2G41451	AT3G01570	AT4G15490	AT5G15995	AT4G13968	AT3G55890		AT5G35110
AT2G41850	AT3G01710	AT4G15670	AT5G17860	AT4G14390	AT3G56180		AT5G35120
AT2G41860	AT3G02120	AT4G15870	AT5G18202	AT4G14811	AT3G56230		AT5G35390
AT2G42090	AT3G02125	AT4G15920	AT5G18330	AT4G14940	AT3G56400		AT5G35890
AT2G42100	AT3G02150	AT4G16030	AT5G18403	AT4G15140	AT3G56890		AT5G35920
AT2G42340	AT3G02480	AT4G16550	AT5G20260	AT4G15490	AT3G56891		AT5G36220
AT2G42540	AT3G02590	AT4G16780	AT5G20740	AT4G15920	AT3G56970		AT5G37150
AT2G42640	AT3G02610	AT4G17810	AT5G21120	AT4G15953	AT3G56980		AT5G37240
AT2G43230	AT3G02640	AT4G18550	AT5G21960	AT4G16030	AT3G57210		AT5G37352
AT2G43270	AT3G03290	AT4G18650	AT5G22550	AT4G16550	AT3G57250		AT5G37920
AT2G43440	AT3G03510	AT4G19430	AT5G22660	AT4G16780	AT3G57270		AT5G38386
AT2G43570	AT3G03620	AT4G19460	AT5G22680	AT4G17780	AT3G57460		AT5G38760
AT2G43660	AT3G04200	AT4G19920	AT5G22930	AT4G17810	AT3G57690		AT5G39100
AT2G43670	AT3G04570	AT4G19970	AT5G22970	AT4G18290	AT3G58060		AT5G39310
AT2G44330	AT3G04850	AT4G20180	AT5G24105	AT4G18510	AT3G58260		AT5G39400
AT2G44380	AT3G04990	AT4G20540	AT5G24316	AT4G19460	AT3G58380		AT5G39420
AT2G44460	AT3G05180	AT4G20560	AT5G24370	AT4G19920	AT3G58480		AT5G39650
AT2G44540	AT3G05300	AT4G21230	AT5G24420	AT4G19970	AT3G58720		AT5G39870
AT2G44550	AT3G05330	AT4G21895	AT5G24940	AT4G20080	AT3G58860		AT5G39880
AT2G44560	AT3G05370	AT4G22065	AT5G24960	AT4G20860	AT3G59480		AT5G40090
AT2G44925	AT3G05690	AT4G22415	AT5G25415	AT4G21020	AT3G59960		AT5G41780
AT2G45110	AT3G05800	AT4G22545	AT5G25420	AT4G21380	AT3G60140		AT5G41908
AT2G45230	AT3G05980	AT4G22630	AT5G25600	AT4G21895	AT3G60318		AT5G42340
AT2G46140	AT3G06390	AT4G23600	AT5G25960	AT4G22415	AT3G60470		AT5G42490
AT2G46255	AT3G06868	AT4G24275	AT5G26330	AT4G22610	AT3G60570		AT5G42530
AT2G46360	AT3G06870	AT4G24600	AT5G26692	AT4G22630	AT3G60780		AT5G42565
AT2G46770	AT3G06880	AT4G25140	AT5G26717	AT4G22680	AT3G60790		AT5G42567
AT2G47030	AT3G06890	AT4G25200	AT5G26840	AT4G22790	AT3G60966		AT5G42955
AT2G47040	AT3G06990	AT4G25420	AT5G27880	AT4G23120	AT3G61040		AT5G43300
AT2G47050	AT3G07620	AT4G25433	AT5G28110	AT4G23170	AT3G61290		AT5G43450
AT2G47150	AT3G07830	AT4G26050	AT5G28200	AT4G23390	AT3G61910		AT5G43513
AT2G47770	AT3G08890	AT4G26150	AT5G28470	AT4G23496	AT3G62170		AT5G43580
AT3G01020	AT3G08900	AT4G26466	AT5G28490	AT4G23600	AT3G62180		AT5G43650
AT3G01085	AT3G09032	AT4G26530	AT5G28690	AT4G24275	AT3G62280		AT5G45570
AT3G01185	AT3G09035	AT4G26740	AT5G28820	AT4G24600	AT3G62640		AT5G45840
AT3G01230	AT3G09070	AT4G27140	AT5G28824	AT4G25010	AT3G62710		AT5G45880
AT3G01240	AT3G09790	AT4G27150	AT5G31909	AT4G25140	AT3G62725		AT5G45910
AT3G01250	AT3G10185	AT4G27160	AT5G32481	AT4G25420	AT3G62930		AT5G45970
AT3G01270	AT3G10200	AT4G27170	AT5G32619	AT4G25433	AT3G62950		AT5G46770
AT3G01290	AT3G10310	AT4G27550	AT5G33350	AT4G25750	AT4G00610		AT5G47000
AT3G01322	AT3G10720	AT4G27810	AT5G34900	AT4G26050	AT4G00780		AT5G47850
AT3G01323	AT3G11160	AT4G27930	AT5G35025	AT4G26150	AT4G00910		AT5G48140
AT3G01324	AT3G11180	AT4G28365	AT5G35390	AT4G26660	AT4G01915		AT5G48175
AT3G01325	AT3G11440	AT4G28520	AT5G35643	AT4G26740	AT4G02250		AT5G48920
AT3G01326	AT3G11930	AT4G28670	AT5G35792	AT4G26890	AT4G02300		AT5G50030
AT3G01327	AT3G12203	AT4G28890	AT5G35920	AT4G27140	AT4G02650		AT5G50200
AT3G01328	AT3G12440	AT4G29180	AT5G36220	AT4G27150	AT4G03290		AT5G50423
AT3G01329	AT3G12545	AT4G29200	AT5G37140	AT4G27160	AT4G03295		AT5G50590
AT3G01331	AT3G12710	AT4G29450	AT5G37820	AT4G27170	AT4G03945		AT5G50830
AT3G01700	AT3G12870	AT4G29470	AT5G37920	AT4G27220	AT4G04077		AT5G51000
AT3G01870	AT3G12880	AT4G30640	AT5G37940	AT4G27550	AT4G04130		AT5G51030
AT3G01880	AT3G13175	AT4G30650	AT5G38340	AT4G27810	AT4G04830		AT5G52120
AT3G02670	AT3G13790	AT4G31320	AT5G38800	AT4G28100	AT4G04980		AT5G52360
AT3G02810	AT3G13960	AT4G31330	AT5G38930	AT4G28130	AT4G04990		AT5G53742
AT3G02940	AT3G14020	AT4G31710	AT5G39030	AT4G28365	AT4G05250		AT5G54095
AT3G02970	AT3G14140	AT4G31805	AT5G39060	AT4G28405	AT4G05490		AT5G55020
AT3G03260	AT3G14210	AT4G31840	AT5G39270	AT4G28420	AT4G07520		AT5G55135
AT3G03400	AT3G14240	AT4G32340	AT5G39290	AT4G28520	AT4G08263		AT5G55780
AT3G03410	AT3G14310	AT4G33420	AT5G39310	AT4G28680	AT4G08780		AT5G56640
AT3G03520	AT3G14450	AT4G33467	AT5G39330	AT4G28870	AT4G09100		AT5G56830
AT3G03828	AT3G14452	AT4G33600	AT5G39645	AT4G28890	AT4G09153		AT5G57200
AT3G04100	AT3G14630	AT4G33800	AT5G39650	AT4G28950	AT4G09190		AT5G57770
AT3G04735	AT3G14650	AT4G33810	AT5G40860	AT4G29020	AT4G09450		AT5G58170
AT3G05310	AT3G15095	AT4G34520	AT5G40900	AT4G29150	AT4G09930		AT5G59370
AT3G05460	AT3G15320	AT4G34810	AT5G41290	AT4G29180	AT4G10010		AT5G59820
AT3G05610	AT3G15370	AT4G35165	AT5G42223	AT4G29200	AT4G10210		AT5G60070
AT3G05725	AT3G15550	AT4G35350	AT5G42565	AT4G29800	AT4G10507		AT5G60310
AT3G05741	AT3G15570	AT4G35810	AT5G42567	AT4G30650	AT4G10690		AT5G60615
AT3G05860	AT3G15670	AT4G36160	AT5G42610	AT4G31320	AT4G11000		AT5G60740
AT3G05975	AT3G15680	AT4G36570	AT5G42860	AT4G31330	AT4G11070		AT5G61680
AT3G06000	AT3G15900	AT4G36700	AT5G42955	AT4G31610	AT4G11200		AT5G61720
AT3G06985	AT3G16020	AT4G36791	AT5G43513	AT4G31710	AT4G11650		AT5G62240
AT3G07005	AT3G16300	AT4G36850	AT5G43580	AT4G31805	AT4G11890		AT5G62848
AT3G07820	AT3G16770	AT4G37140	AT5G43650	AT4G31840	AT4G11930		AT5G64490
AT3G07850	AT3G16950	AT4G37150	AT5G43690	AT4G32170	AT4G11940		AT5G64790
AT3G09140	AT3G17185	AT4G37620	AT5G43890	AT4G32950	AT4G12150		AT5G64820
AT3G09220	AT3G17200	AT4G37780	AT5G44020	AT4G33330	AT4G12530		AT5G65080
AT3G09240	AT3G17360	AT4G38000	AT5G44140	AT4G33467	AT4G12917		AT5G66690
AT3G09340	AT3G17580	AT4G38340	AT5G44640	AT4G33600	AT4G13075		AT5G66740
AT3G09530	AT3G17609	AT4G38530	AT5G45340	AT4G33610	AT4G13080
AT3G09680	AT3G17640	AT4G38850	AT5G45580	AT4G34520	AT4G13090
AT3G09990	AT3G17840	AT4G39925	AT5G45630	AT4G35350	AT4G13095
AT3G10195	AT3G18010	AT5G01150	AT5G45670	AT4G35810	AT4G13263
AT3G10240	AT3G18180	AT5G01910	AT5G45730	AT4G36160	AT4G13480
AT3G10510	AT3G18280	AT5G02350	AT5G45910	AT4G36470	AT4G13490
AT3G10575	AT3G18320	AT5G03120	AT5G46040	AT4G36700	AT4G13560
AT3G10580	AT3G18570	AT5G03260	AT5G46610	AT4G36850	AT4G13955
AT3G10595	AT3G18660	AT5G03810	AT5G46770	AT4G37070	AT4G14272
AT3G10600	AT3G19370	AT5G03820	AT5G47075	AT4G37150	AT4G14276
AT3G10750	AT3G19660	AT5G03950	AT5G47850	AT4G38000	AT4G14400
AT3G10780	AT3G19800	AT5G03960	AT5G48140	AT4G38740	AT4G15040
AT3G10790	AT3G19850	AT5G04680	AT5G48175	AT4G39925	AT4G15050
AT3G10870	AT3G20015	AT5G05020	AT5G48905	AT5G01150	AT4G15053
AT3G11750	AT3G20130	AT5G05160	AT5G49270	AT5G01185	AT4G15056
AT3G11920	AT3G20140	AT5G06630	AT5G49340	AT5G01225	AT4G15590
AT3G11990	AT3G20150	AT5G07160	AT5G49448	AT5G01370	AT4G15610
AT3G12160	AT3G20260	AT5G07200	AT5G49450	AT5G02350	AT4G15650
AT3G12190	AT3G20450	AT5G07460	AT5G50115	AT5G02980	AT4G15700
AT3G12420	AT3G20590	AT5G07500	AT5G50423	AT5G03170	AT4G15733
AT3G12700	AT3G20760	AT5G07520	AT5G50760	AT5G03810	AT4G15735
AT3G12775	AT3G20898	AT5G07570	AT5G51000	AT5G03820	AT4G15760
AT3G12977	AT3G20900	AT5G08070	AT5G51750	AT5G03840	AT4G15980
AT3G13370	AT3G20975	AT5G11290	AT5G52020	AT5G04885	AT4G16008
AT3G13390	AT3G20978	AT5G11660	AT5G52605	AT5G05020	AT4G16165
AT3G13400	AT3G21020	AT5G12460	AT5G52975	AT5G05160	AT4G16515
AT3G13820	AT3G21550	AT5G13205	AT5G53190	AT5G05180	AT4G17505
AT3G13830	AT3G21680	AT5G13887	AT5G53230	AT5G05650	AT4G17713
AT3G14040	AT3G21690	AT5G14180	AT5G54820	AT5G06470	AT4G17860
AT3G14060	AT3G21755	AT5G14360	AT5G55020	AT5G07160	AT4G18050
AT3G14480	AT3G21760	AT5G15240	AT5G55430	AT5G07190	AT4G18596
AT3G14670	AT3G21800	AT5G15310	AT5G55780	AT5G07200	AT4G19038
AT3G14850	AT3G21890	AT5G16190	AT5G56050	AT5G07460	AT4G19395
AT3G15280	AT3G21910	AT5G16230	AT5G56060	AT5G07500	AT4G19580
AT3G15490	AT3G22640	AT5G16235	AT5G56400	AT5G07560	AT4G19905
AT3G15960	AT3G22800	AT5G16410	AT5G56480	AT5G08000	AT4G20000
AT3G16210	AT3G23090	AT5G17590	AT5G56490	AT5G08030	AT4G20800
AT3G16900	AT3G23165	AT5G17800	AT5G56570	AT5G08070	AT4G20820
AT3G16960	AT3G23167	AT5G18300	AT5G57640	AT5G12460	AT4G20990
AT3G16970	AT3G23350	AT5G18633	AT5G58170	AT5G12870	AT4G21445
AT3G17060	AT3G23360	AT5G19340	AT5G58412	AT5G13887	AT4G22020
AT3G17140	AT3G23470	AT5G19650	AT5G58782	AT5G14180	AT4G22700
AT3G17150	AT3G23550	AT5G20400	AT5G59130	AT5G14450	AT4G22980
AT3G17152	AT3G23730	AT5G20690	AT5G59260	AT5G15160	AT4G23080
AT3G17230	AT3G23770	AT5G22470	AT5G59360	AT5G15240	AT4G23090
AT3G17265	AT3G24400	AT5G22490	AT5G59530	AT5G15853	AT4G23230
AT3G17320	AT3G24600	AT5G22580	AT5G60070	AT5G16230	AT4G23260
AT3G17480	AT3G24610	AT5G24090	AT5G60330	AT5G16235	AT4G23350
AT3G17520	AT3G24650	AT5G24110	AT5G60615	AT5G16250	AT4G23360
AT3G17560	AT3G24770	AT5G24130	AT5G61470	AT5G16740	AT4G23970
AT3G17570	AT3G25030	AT5G24206	AT5G63600	AT5G17040	AT4G24310
AT3G18330	AT3G25190	AT5G24470	AT5G63720	AT5G17590	AT4G24640
AT3G18340	AT3G25410	AT5G24640	AT5G64490	AT5G17700	AT4G24974
AT3G18362	AT3G25620	AT5G24900	AT5G64790	AT5G17800	AT4G24975
AT3G18550	AT3G25730	AT5G25260	AT5G64890	AT5G18300	AT4G25110
AT3G18810	AT3G26080	AT5G25310	AT5G65980	AT5G19100	AT4G25780
AT3G19160	AT3G26250	AT5G25330		AT5G19340	AT4G25820
AT3G19310	AT3G26300	AT5G25370		AT5G19520	AT4G26260
AT3G19350	AT3G26330	AT5G25390		AT5G19650	AT4G26560
AT3G19560	AT3G26742	AT5G25422		AT5G19880	AT4G26920
AT3G19595	AT3G26744	AT5G25615		AT5G20240	AT4G27580
AT3G19890	AT3G26790	AT5G26345		AT5G20400	AT4G27790
AT3G20030	AT3G26820	AT5G26730		AT5G22470	AT4G27920
AT3G20380	AT3G27030	AT5G27200		AT5G22490	AT4G28280
AT3G20580	AT3G27473	AT5G28415		AT5G22580	AT4G28460
AT3G20710	AT3G27660	AT5G28420		AT5G24090	AT4G29033
AT3G20865	AT3G27690	AT5G28627		AT5G24130	AT4G29035
AT3G21170	AT3G28040	AT5G28826		AT5G24900	AT4G29273
AT3G21180	AT3G28130	AT5G28845		AT5G25090	AT4G29281
AT3G21410	AT3G28150	AT5G28880		AT5G25330	AT4G29283
AT3G21450	AT3G28155	AT5G32405		AT5G25400	AT4G29285
AT3G21730	AT3G28160	AT5G33432		AT5G25422	AT4G29370
AT3G21870	AT3G28315	AT5G34790		AT5G25615	AT4G29460
AT3G22100	AT3G28415	AT5G34795		AT5G26260	AT4G29690
AT3G22142	AT3G28420	AT5G34800		AT5G26345	AT4G30050
AT3G22275	AT3G28920	AT5G34840		AT5G26730	AT4G30064
AT3G22421	AT3G29030	AT5G35050		AT5G26790	AT4G30070
AT3G22490	AT3G29105	AT5G35344		AT5G27130	AT4G30074
AT3G22500	AT3G29150	AT5G35380		AT5G27200	AT4G30120
AT3G22510	AT3G29190	AT5G35480		AT5G27370	AT4G30140
AT3G22720	AT3G29255	AT5G35580		AT5G27495	AT4G30410
AT3G23060	AT3G29300	AT5G35610		AT5G28263	AT4G31110
AT3G23250	AT3G29510	AT5G35780		AT5G28280	AT4G32105
AT3G23530	AT3G29590	AT5G36150		AT5G28440	AT4G32378
AT3G23725	AT3G29767	AT5G36330		AT5G28490	AT4G32380
AT3G23860	AT3G29770	AT5G36340		AT5G28826	AT4G32510
AT3G23955	AT3G30280	AT5G36870		AT5G30520	AT4G33230
AT3G24060	AT3G30290	AT5G37050		AT5G31981	AT4G33830
AT3G24065	AT3G30450	AT5G37478		AT5G33400	AT4G33840
AT3G24068	AT3G30833	AT5G37665		AT5G35380	AT4G33860
AT3G24093	AT3G31402	AT5G37730		AT5G35610	AT4G33960
AT3G24130	AT3G31900	AT5G38005		AT5G35775	AT4G34060
AT3G24210	AT3G31902	AT5G38140		AT5G35940	AT4G34380
AT3G24280	AT3G31990	AT5G38160		AT5G36100	AT4G34470
AT3G24510	AT3G32092	AT5G38170		AT5G36200	AT4G34580
AT3G24513	AT3G32280	AT5G38180		AT5G36870	AT4G35010
AT3G24780	AT3G32310	AT5G38275		AT5G36903	AT4G35610
AT3G24790	AT3G32313	AT5G38750		AT5G36935	AT4G35690
AT3G25165	AT3G33377	AT5G38780		AT5G37478	AT4G35700
AT3G25170	AT3G42670	AT5G39100		AT5G37520	AT4G35725
AT3G25270	AT3G42725	AT5G39720		AT5G37665	AT4G35770
AT3G25280	AT3G43095	AT5G39760		AT5G37950	AT4G36490
AT3G25420	AT3G43110	AT5G40010		AT5G37980	AT4G38860
AT3G25450	AT3G43210	AT5G40360		AT5G38020	AT4G39000
AT3G25750	AT3G43600	AT5G41380		AT5G38140	AT4G39110
AT3G25760	AT3G43630	AT5G41440		AT5G38160	AT4G39360
AT3G25770	AT3G43670	AT5G41761		AT5G38170	AT4G39610
AT3G25990	AT3G43800	AT5G41765		AT5G38180	AT4G39700
AT3G26170	AT3G43960	AT5G41830		AT5G39205	AT4G40020
AT3G26180	AT3G44096	AT5G42580		AT5G39720	AT5G01335
AT3G26270	AT3G44150	AT5G43290		AT5G40360	AT5G01550
AT3G26310	AT3G44460	AT5G43380		AT5G40645	AT5G02110
AT3G26830	AT3G44755	AT5G44050		AT5G41471	AT5G02900
AT3G26934	AT3G44830	AT5G44120		AT5G41761	AT5G03000
AT3G26940	AT3G44960	AT5G44310		AT5G43290	AT5G03204
AT3G27070	AT3G45070	AT5G44569		AT5G44050	AT5G03580
AT3G27270	AT3G45080	AT5G44575		AT5G44120	AT5G03590
AT3G27321	AT3G45095	AT5G45070		AT5G44310	AT5G04350
AT3G27425	AT3G45120	AT5G45210		AT5G44390	AT5G05070
AT3G27440	AT3G45130	AT5G45540		AT5G44562	AT5G05290
AT3G27650	AT3G45610	AT5G45770		AT5G44569	AT5G06490
AT3G27710	AT3G45780	AT5G46050		AT5G44575	AT5G06500
AT3G27831	AT3G46240	AT5G46690		AT5G45070	AT5G07410
AT3G27910	AT3G46614	AT5G46915		AT5G45210	AT5G07420
AT3G27940	AT3G46700	AT5G47130		AT5G45530	AT5G07430
AT3G27950	AT3G46810	AT5G47500		AT5G45770	AT5G09360
AT3G27999	AT3G46890	AT5G47670		AT5G46050	AT5G09550
AT3G28230	AT3G47190	AT5G48710		AT5G46115	AT5G09730
AT3G28243	AT3G47230	AT5G49070		AT5G46295	AT5G10880
AT3G28250	AT3G47410	AT5G49330		AT5G46350	AT5G11050
AT3G28490	AT3G47965	AT5G49760		AT5G46690	AT5G11130
AT3G28520	AT3G48185	AT5G49850		AT5G47550	AT5G11210
AT3G28705	AT3G48200	AT5G49860		AT5G47670	AT5G11540
AT3G28750	AT3G48510	AT5G50090		AT5G48490	AT5G11940
AT3G28780	AT3G48660	AT5G50290		AT5G49250	AT5G12000
AT3G28790	AT3G48700	AT5G50600		AT5G49760	AT5G12060
AT3G28820	AT3G48740	AT5G50700		AT5G49850	AT5G12180
AT3G28830	AT3G48980	AT5G50770		AT5G50090	AT5G13990
AT3G28980	AT3G49260	AT5G50950		AT5G50220	AT5G14380
AT3G28990	AT3G49668	AT5G51860		AT5G50600	AT5G14400
AT3G29060	AT3G49670	AT5G52270		AT5G50700	AT5G14545
AT3G29152	AT3G49950	AT5G52471		AT5G50740	AT5G14740
AT3G29156	AT3G50230	AT5G52830		AT5G50770	AT5G14995
AT3G29570	AT3G50470	AT5G53740		AT5G51210	AT5G15000
AT3G29572	AT3G50750	AT5G54040		AT5G51390	AT5G15110
AT3G29670	AT3G50890	AT5G54060		AT5G51860	AT5G15140
AT3G29830	AT3G51230	AT5G54250		AT5G52160	AT5G15670
AT3G30842	AT3G51280	AT5G54410		AT5G52830	AT5G16330
AT3G30843	AT3G51420	AT5G54420		AT5G52860	AT5G16500
AT3G30844	AT3G51480	AT5G54740		AT5G53090	AT5G17120
AT3G32925	AT3G51600	AT5G55240		AT5G54040	AT5G17180
AT3G42806	AT3G51740	AT5G55360		AT5G54060	AT5G18403
AT3G42830	AT3G51930	AT5G56410		AT5G54250	AT5G18600
AT3G42835	AT3G52110	AT5G56970		AT5G54410	AT5G18910
AT3G42836	AT3G52130	AT5G57090		AT5G54740	AT5G19240
AT3G42880	AT3G52770	AT5G57123		AT5G54950	AT5G19270
AT3G43120	AT3G52910	AT5G57260		AT5G55090	AT5G19360
AT3G43200	AT3G52960	AT5G57420		AT5G55240	AT5G19473
AT3G43205	AT3G52970	AT5G57500		AT5G55360	AT5G19710
AT3G43530	AT3G53190	AT5G57625		AT5G55590	AT5G20260
AT3G43660	AT3G53210	AT5G57920		AT5G56075	AT5G20370
AT3G43710	AT3G53232	AT5G59170		AT5G56410	AT5G20390
AT3G43825	AT3G53330	AT5G59670		AT5G56970	AT5G20430
AT3G43830	AT3G53380	AT5G59990		AT5G57090	AT5G21120
AT3G43850	AT3G53480	AT5G60490		AT5G57123	AT5G21130
AT3G43860	AT3G54320	AT5G60560		AT5G57260	AT5G22570
AT3G43990	AT3G54510	AT5G60880		AT5G57420	AT5G22610
AT3G44080	AT3G54770	AT5G61610		AT5G57500	AT5G22970
AT3G44090	AT3G55566	AT5G61997		AT5G57625	AT5G23270
AT3G44274	AT3G55646	AT5G62100		AT5G57920	AT5G23790
AT3G44650	AT3G55660	AT5G62165		AT5G57980	AT5G24105
AT3G44810	AT3G55710	AT5G62630		AT5G58630	AT5G24210
AT3G45110	AT3G56100	AT5G63240		AT5G59170	AT5G24316
AT3G45150	AT3G56220	AT5G63450		AT5G59590	AT5G24770
AT3G45180	AT3G56240	AT5G63560		AT5G60490	AT5G24880
AT3G45200	AT3G56810	AT5G63590		AT5G60880	AT5G24940
AT3G45243	AT3G57130	AT5G64110		AT5G61180	AT5G25415
AT3G45245	AT3G57380	AT5G64395		AT5G62100	AT5G25430
AT3G45252	AT3G57440	AT5G64450		AT5G62550	AT5G25600
AT3G45550	AT3G57500	AT5G65080		AT5G62630	AT5G26060
AT3G45670	AT3G57600	AT5G66020		AT5G63065	AT5G26650
AT3G45760	AT3G57645	AT5G67450		AT5G63240	AT5G26692
AT3G45950	AT3G57740			AT5G63450	AT5G26717
AT3G45990	AT3G57860			AT5G63560	AT5G27580
AT3G46090	AT3G57920			AT5G63590	AT5G27870
AT3G46160	AT3G58060			AT5G65590	AT5G27880
AT3G46310	AT3G58120			AT5G66985	AT5G27889
AT3G46370	AT3G58330			AT5G67411	AT5G27890
AT3G46520	AT3G58420			AT5G67450	AT5G27895
AT3G46750	AT3G58650				AT5G27960
AT3G46840	AT3G58740				AT5G28145
AT3G46850	AT3G58850				AT5G28200
AT3G46860	AT3G59510				AT5G28463
AT3G46900	AT3G59765				AT5G28680
AT3G47030	AT3G59850				AT5G28690
AT3G47130	AT3G60000				AT5G28820
AT3G47140	AT3G60930				AT5G32433
AT3G47480	AT3G61010				AT5G32473
AT3G47580	AT3G61020				AT5G32619
AT3G47870	AT3G61118				AT5G33340
AT3G48130	AT3G61150				AT5G33350
AT3G48208	AT3G61220				AT5G35110
AT3G48340	AT3G61230				AT5G35120
AT3G48450	AT3G61680				AT5G35390
AT3G48650	AT3G61830				AT5G35900
AT3G48720	AT3G61930				AT5G37820
AT3G48850	AT3G62110				AT5G38330
AT3G48950	AT3G62230				AT5G38430
AT3G49200	AT3G62700				AT5G38760
AT3G49210	AT3G62760				AT5G38930
AT3G49450	AT3G62820				AT5G39030
AT3G49520	AT3G62860				AT5G39090
AT3G49540	AT3G63040				AT5G39260
AT3G49580	AT3G63052				AT5G39270
AT3G49770	AT3G63160				AT5G39280
AT3G50020	AT3G63300				AT5G39290
AT3G50510	AT3G63430				AT5G39300
AT3G50720	AT4G00165				AT5G39310
AT3G50740	AT4G00180				AT5G39400
AT3G51171	AT4G00460				AT5G39420
AT3G51680	AT4G00480				AT5G39440
AT3G52010	AT4G00700				AT5G39645
AT3G52690	AT4G01160				AT5G39700
AT3G52790	AT4G01260				AT5G39750
AT3G53640	AT4G01265				AT5G39880
AT3G54310	AT4G01350				AT5G39995
AT3G54580	AT4G01760				AT5G40680
AT3G54700	AT4G01910				AT5G40900
AT3G54800	AT4G02130				AT5G41500
AT3G54830	AT4G02170				AT5G41540
AT3G54925	AT4G02180				AT5G41780
AT3G55252	AT4G02800				AT5G42223
AT3G55254	AT4G03050				AT5G42490
AT3G55258	AT4G03100				AT5G42530
AT3G55590	AT4G03110				AT5G42565
AT3G55630	AT4G03270				AT5G42567
AT3G55650	AT4G03450				AT5G42640
AT3G55665	AT4G03965				AT5G43185
AT3G55672	AT4G03990				AT5G43300
AT3G55677	AT4G04410				AT5G43580
AT3G55940	AT4G04450				AT5G43650
AT3G56180	AT4G04460				AT5G43690
AT3G56891	AT4G04590				AT5G43890
AT3G56970	AT4G04695				AT5G44140
AT3G56980	AT4G05130				AT5G44530
AT3G57160	AT4G05200				AT5G44830
AT3G57210	AT4G06670				AT5G45630
AT3G57270	AT4G06672				AT5G45730
AT3G57310	AT4G07869				AT5G45810
AT3G57690	AT4G08150				AT5G45840
AT3G58210	AT4G08290				AT5G45880
AT3G58260	AT4G08430				AT5G45890
AT3G58320	AT4G08530				AT5G45910
AT3G58480	AT4G08710				AT5G45970
AT3G59230	AT4G08950				AT5G46040
AT3G59340	AT4G08991				AT5G46370
AT3G59480	AT4G09070				AT5G46590
AT3G59610	AT4G09160				AT5G46770
AT3G59790	AT4G10240				AT5G46780
AT3G59960	AT4G10265				AT5G46810
AT3G60140	AT4G10270				AT5G46820
AT3G60570	AT4G10490				AT5G46875
AT3G60710	AT4G10560				AT5G46950
AT3G60790	AT4G10630				AT5G46960
AT3G60890	AT4G10640				AT5G47000
AT3G61172	AT4G10655				AT5G47075
AT3G61177	AT4G11040				AT5G47077
AT3G61290	AT4G11300				AT5G48140
AT3G61450	AT4G11460				AT5G48657
AT3G61500	AT4G11550				AT5G48905
AT3G61510	AT4G11720				AT5G49448
AT3G61910	AT4G11900				AT5G49450
AT3G62170	AT4G11910				AT5G49690
AT3G62180	AT4G12730				AT5G50030
AT3G62340	AT4G12950				AT5G50060
AT3G62350	AT4G12970				AT5G50070
AT3G62640	AT4G13100				AT5G50115
AT3G62710	AT4G13195				AT5G50423
AT3G63230	AT4G13210				AT5G50590
AT3G66656	AT4G13260				AT5G50830
AT4G00160	AT4G13290				AT5G51000
AT4G00320	AT4G13540				AT5G51030
AT4G00610	AT4G13611				AT5G51420
AT4G01915	AT4G13992				AT5G52360
AT4G02250	AT4G14080				AT5G52490
AT4G02300	AT4G14330				AT5G52605
AT4G02312	AT4G14390				AT5G52610
AT4G02314	AT4G14548				AT5G52760
AT4G02320	AT4G14550				AT5G53610
AT4G02410	AT4G14690				AT5G53635
AT4G02650	AT4G14695				AT5G53710
AT4G02733	AT4G14723				AT5G53730
AT4G03290	AT4G14770				AT5G53775
AT4G03945	AT4G14811				AT5G54095
AT4G04580	AT4G14815				AT5G54210
AT4G04830	AT4G14940				AT5G54215
AT4G04980	AT4G14980				AT5G54220
AT4G04985	AT4G15140				AT5G54225
AT4G04990	AT4G15390				AT5G54350
AT4G05250	AT4G15490				AT5G54585
AT4G05470	AT4G15620				AT5G54710
AT4G05490	AT4G15630				AT5G54820
AT4G05497	AT4G15870				AT5G55131
AT4G05630	AT4G15920				AT5G55132
AT4G06534	AT4G15953				AT5G55880
AT4G07850	AT4G16140				AT5G56050
AT4G08028	AT4G16355				AT5G56480
AT4G08370	AT4G16550				AT5G56490
AT4G08550	AT4G16780				AT5G56640
AT4G09090	AT4G17718				AT5G57010
AT4G09153	AT4G17810				AT5G57400
AT4G09190	AT4G17920				AT5G57640
AT4G09360	AT4G18290				AT5G58050
AT4G09450	AT4G18550				AT5G58080
AT4G09462	AT4G18650				AT5G58170
AT4G09870	AT4G18670				AT5G58412
AT4G10010	AT4G18820				AT5G58810
AT4G10160	AT4G19380				AT5G58840
AT4G10190	AT4G19460				AT5G58850
AT4G10210	AT4G19520				AT5G59130
AT4G10670	AT4G19920				AT5G59190
AT4G10895	AT4G19970				AT5G59370
AT4G11000	AT4G19980				AT5G59520
AT4G11400	AT4G20040				AT5G60010
AT4G11510	AT4G20210				AT5G60060
AT4G11890	AT4G20510				AT5G60440
AT4G11930	AT4G20860				AT5G60615
AT4G11940	AT4G21050				AT5G61470
AT4G12140	AT4G21230				AT5G61620
AT4G12150	AT4G21380				AT5G61680
AT4G12210	AT4G21850				AT5G61720
AT4G12260	AT4G22010				AT5G62830
AT4G12530	AT4G22100				AT5G63087
AT4G12860	AT4G22230				AT5G64240
AT4G13060	AT4G22233				AT5G64790
AT4G13080	AT4G22235				AT5G64820
AT4G13095	AT4G22250				AT5G64890
AT4G13263	AT4G22630				AT5G65690
AT4G13380	AT4G22640
AT4G13490	AT4G22680
AT4G13700	AT4G22790
AT4G13955	AT4G23170
AT4G14250	AT4G23310
AT4G14272	AT4G23430
AT4G14276	AT4G23500
AT4G14670	AT4G23600
AT4G14750	AT4G23670
AT4G14805	AT4G23680
AT4G15040	AT4G23790
AT4G15050	AT4G24110
AT4G15053	AT4G24275
AT4G15056	AT4G24660
AT4G15590	AT4G24760
AT4G15710	AT4G24790
AT4G15735	AT4G25140
AT4G15755	AT4G25240
AT4G15970	AT4G25420
AT4G16146	AT4G25433
AT4G16165	AT4G25750
AT4G16195	AT4G25980
AT4G16600	AT4G25990
AT4G16810	AT4G26050
AT4G17160	AT4G26150
AT4G17210	AT4G26280
AT4G17215	AT4G26530
AT4G17505	AT4G26660
AT4G17713	AT4G26740
AT4G17850	AT4G26890
AT4G17860	AT4G27140
AT4G18250	AT4G27150
AT4G18430	AT4G27160
AT4G18870	AT4G27250
AT4G18900	AT4G27450
AT4G18920	AT4G27550
AT4G19035	AT4G27570
AT4G19905	AT4G27810
AT4G20000	AT4G28100
AT4G20080	AT4G28190
AT4G20200	AT4G28365
AT4G20725	AT4G28405
AT4G20800	AT4G28410
AT4G20810	AT4G28420
AT4G21010	AT4G28680
AT4G22030	AT4G28890
AT4G22060	AT4G28950
AT4G22115	AT4G29020
AT4G22430	AT4G29150
AT4G22470	AT4G29180
AT4G22700	AT4G29200
AT4G22980	AT4G29230
AT4G23080	AT4G29270
AT4G23090	AT4G29300
AT4G23110	AT4G29310
AT4G23120	AT4G29920
AT4G23220	AT4G30130
AT4G23230	AT4G30370
AT4G23350	AT4G30380
AT4G23360	AT4G30650
AT4G23375	AT4G30850
AT4G23520	AT4G30880
AT4G23700	AT4G31060
AT4G23960	AT4G31320
AT4G24640	AT4G31330
AT4G24650	AT4G31650
AT4G24974	AT4G31710
AT4G24975	AT4G31805
AT4G25040	AT4G31840
AT4G25330	AT4G32490
AT4G25530	AT4G33010
AT4G25820	AT4G33070
AT4G26030	AT4G33330
AT4G26260	AT4G33600
AT4G26390	AT4G33610
AT4G26470	AT4G33800
AT4G26485	AT4G33810
AT4G26820	AT4G34135
AT4G27890	AT4G34510
AT4G27920	AT4G34520
AT4G28000	AT4G34680
AT4G28700	AT4G34800
AT4G28775	AT4G34950
AT4G28840	AT4G35165
AT4G28920	AT4G35390
AT4G28930	AT4G35560
AT4G29033	AT4G35620
AT4G29035	AT4G35720
AT4G29273	AT4G35730
AT4G29280	AT4G35810
AT4G29281	AT4G36010
AT4G29283	AT4G36160
AT4G29285	AT4G36470
AT4G29370	AT4G36700
AT4G29460	AT4G36850
AT4G30050	AT4G36930
AT4G30064	AT4G37150
AT4G30067	AT4G37450
AT4G30070	AT4G38000
AT4G30074	AT4G38340
AT4G30120	AT4G39290
AT4G30140	AT4G39756
AT4G31830	AT4G39925
AT4G31900	AT5G01040
AT4G32080	AT5G01150
AT4G32105	AT5G01185
AT4G32110	AT5G01225
AT4G32370	AT5G01370
AT4G32378	AT5G01910
AT4G32380	AT5G02440
AT4G32580	AT5G03120
AT4G33550	AT5G03435
AT4G33830	AT5G03668
AT4G33840	AT5G03790
AT4G33860	AT5G03810
AT4G34330	AT5G03840
AT4G34332	AT5G03870
AT4G34580	AT5G03950
AT4G34780	AT5G04000
AT4G35010	AT5G05160
AT4G35610	AT5G05180
AT4G35690	AT5G05810
AT4G35725	AT5G06470
AT4G35733	AT5G07030
AT4G35985	AT5G07190
AT4G36430	AT5G07200
AT4G36490	AT5G07460
AT4G36590	AT5G07500
AT4G36600	AT5G07510
AT4G36820	AT5G07520
AT4G37220	AT5G07530
AT4G37950	AT5G07560
AT4G38190	AT5G07570
AT4G38400	AT5G07571
AT4G38700	AT5G07572
AT4G38770	AT5G08000
AT4G38870	AT5G08030
AT4G38880	AT5G08070
AT4G39000	AT5G08460
AT4G39360	AT5G09210
AT4G39590	AT5G09520
AT4G39650	AT5G09640
AT4G39750	AT5G09780
AT4G39753	AT5G09970
AT4G39917	AT5G10040
AT5G01550	AT5G10120
AT5G01860	AT5G10130
AT5G02180	AT5G10200
AT5G02330	AT5G10310
AT5G02390	AT5G10430
AT5G02600	AT5G10510
AT5G02930	AT5G10720
AT5G03020	AT5G10990
AT5G03570	AT5G11160
AT5G03580	AT5G11320
AT5G03600	AT5G11420
AT5G03620	AT5G11550
AT5G03920	AT5G11590
AT5G03930	AT5G12460
AT5G04045	AT5G13290
AT5G04047	AT5G13600
AT5G04347	AT5G13980
AT5G04350	AT5G14180
AT5G05030	AT5G14330
AT5G05113	AT5G14450
AT5G05120	AT5G15150
AT5G05220	AT5G15240
AT5G05260	AT5G15310
AT5G06020	AT5G15530
AT5G06030	AT5G15580
AT5G06040	AT5G15581
AT5G06380	AT5G15845
AT5G06500	AT5G15850
AT5G06720	AT5G16030
AT5G06760	AT5G16230
AT5G06870	AT5G16235
AT5G07410	AT5G16250
AT5G07420	AT5G16340
AT5G07430	AT5G16350
AT5G07780	AT5G17040
AT5G07850	AT5G17490
AT5G08360	AT5G17590
AT5G08505	AT5G17700
AT5G09360	AT5G17800
AT5G09370	AT5G17810
AT5G09490	AT5G18300
AT5G09500	AT5G18310
AT5G09730	AT5G19140
AT5G10230	AT5G19220
AT5G10500	AT5G19221
AT5G10590	AT5G19340
AT5G10660	AT5G19520
AT5G10880	AT5G19560
AT5G11050	AT5G19740
AT5G11130	AT5G19880
AT5G11180	AT5G20400
AT5G11210	AT5G20550
AT5G11220	AT5G20635
AT5G11540	AT5G20790
AT5G12000	AT5G20950
AT5G12060	AT5G21080
AT5G12180	AT5G22300
AT5G13150	AT5G22580
AT5G13200	AT5G22810
AT5G13210	AT5G23100
AT5G13580	AT5G24090
AT5G13620	AT5G24130
AT5G13825	AT5G24180
AT5G13880	AT5G24900
AT5G13900	AT5G24920
AT5G14400	AT5G25090
AT5G14670	AT5G25310
AT5G14740	AT5G25320
AT5G14860	AT5G25330
AT5G15000	AT5G25400
AT5G15110	AT5G25490
AT5G15140	AT5G25615
AT5G15160	AT5G25840
AT5G15265	AT5G26594
AT5G15660	AT5G26730
AT5G16453	AT5G26790
AT5G17120	AT5G27190
AT5G17470	AT5G27200
AT5G17730	AT5G27420
AT5G19110	AT5G27590
AT5G19230	AT5G28010
AT5G19240	AT5G28235
AT5G19270	AT5G28263
AT5G19315	AT5G28415
AT5G19473	AT5G28490
AT5G19600	AT5G28640
AT5G19700	AT5G28650
AT5G19710	AT5G28826
AT5G20260	AT5G34790
AT5G20370	AT5G34795
AT5G20390	AT5G34800
AT5G20430	AT5G35205
AT5G20440	AT5G35940
AT5G20560	AT5G36100
AT5G20710	AT5G36110
AT5G20740	AT5G36150
AT5G21120	AT5G36310
AT5G21130	AT5G36350
AT5G22044	AT5G36710
AT5G22610	AT5G36800
AT5G22680	AT5G36870
AT5G22791	AT5G36937
AT5G22792	AT5G37010
AT5G22980	AT5G38005
AT5G22990	AT5G38010
AT5G23212	AT5G38140
AT5G23270	AT5G38160
AT5G23650	AT5G38170
AT5G23700	AT5G38280
AT5G23790	AT5G38300
AT5G24105	AT5G38393
AT5G24110	AT5G38530
AT5G24200	AT5G38700
AT5G24316	AT5G39100
AT5G24355	AT5G39110
AT5G24420	AT5G39120
AT5G24440	AT5G39240
AT5G24510	AT5G39760
AT5G24770	AT5G39860
AT5G25410	AT5G39890
AT5G25415	AT5G39930
AT5G25440	AT5G40030
AT5G25950	AT5G40360
AT5G26060	AT5G40420
AT5G26250	AT5G40700
AT5G26630	AT5G40800
AT5G26650	AT5G41160
AT5G26692	AT5G41280
AT5G26717	AT5G41315
AT5G26805	AT5G41380
AT5G27238	AT5G41710
AT5G27870	AT5G41830
AT5G27880	AT5G41840
AT5G27890	AT5G42200
AT5G27910	AT5G42780
AT5G27960	AT5G43000
AT5G28680	AT5G43290
AT5G28690	AT5G43750
AT5G28845	AT5G44040
AT5G32619	AT5G44050
AT5G33350	AT5G44120
AT5G33399	AT5G44260
AT5G35110	AT5G44270
AT5G35390	AT5G44410
AT5G35735	AT5G44460
AT5G35900	AT5G44560
AT5G35920	AT5G44562
AT5G36904	AT5G44569
AT5G36905	AT5G44574
AT5G37520	AT5G44630
AT5G38120	AT5G44680
AT5G38195	AT5G45070
AT5G38270	AT5G45210
AT5G38330	AT5G45450
AT5G38800	AT5G45720
AT5G38930	AT5G45770
AT5G38960	AT5G45830
AT5G39030	AT5G46240
AT5G39230	AT5G46290
AT5G39260	AT5G46690
AT5G39270	AT5G46880
AT5G39280	AT5G47500
AT5G39290	AT5G47550
AT5G39300	AT5G47670
AT5G39400	AT5G47720
AT5G39440	AT5G47910
AT5G39560	AT5G48170
AT5G39580	AT5G48360
AT5G39645	AT5G48450
AT5G39700	AT5G48490
AT5G39880	AT5G49190
AT5G39995	AT5G49330
AT5G40040	AT5G49440
AT5G40260	AT5G49760
AT5G40380	AT5G49780
AT5G40680	AT5G49800
AT5G40730	AT5G50010
AT5G40900	AT5G50011
AT5G40940	AT5G50012
AT5G41040	AT5G50090
AT5G41450	AT5G50345
AT5G41510	AT5G50740
AT5G41630	AT5G50770
AT5G41780	AT5G51210
AT5G41820	AT5G51600
AT5G42223	AT5G51860
AT5G42567	AT5G52600
AT5G42640	AT5G52830
AT5G42910	AT5G52860
AT5G43090	AT5G52920
AT5G43185	AT5G53090
AT5G43300	AT5G53210
AT5G43640	AT5G53660
AT5G43650	AT5G54060
AT5G43840	AT5G54190
AT5G43890	AT5G54250
AT5G44020	AT5G54410
AT5G44830	AT5G54420
AT5G44950	AT5G54470
AT5G44973	AT5G54560
AT5G45220	AT5G54740
AT5G45630	AT5G55090
AT5G45690	AT5G55360
AT5G45810	AT5G55370
AT5G45840	AT5G55410
AT5G45880	AT5G55620
AT5G46040	AT5G55650
AT5G46200	AT5G55730
AT5G46370	AT5G56075
AT5G46810	AT5G56120
AT5G46820	AT5G56410
AT5G46877	AT5G56560
AT5G46950	AT5G56620
AT5G46960	AT5G56640
AT5G47000	AT5G56860
AT5G47075	AT5G56970
AT5G47175	AT5G57090
AT5G48140	AT5G57123
AT5G48905	AT5G57130
AT5G48945	AT5G57260
AT5G48953	AT5G57500
AT5G48980	AT5G57810
AT5G49448	AT5G57920
AT5G49450	AT5G58050
AT5G50030	AT5G58580
AT5G50050	AT5G58600
AT5G50060	AT5G58630
AT5G50070	AT5G59170
AT5G50115	AT5G59590
AT5G50200	AT5G59990
AT5G50470	AT5G60450
AT5G50480	AT5G60510
AT5G50490	AT5G60970
AT5G50720	AT5G61130
AT5G50760	AT5G61180
AT5G50830	AT5G61610
AT5G51030	AT5G62100
AT5G51105	AT5G62280
AT5G51845	AT5G62400
AT5G52140	AT5G62550
AT5G52150	AT5G62630
AT5G52160	AT5G62850
AT5G52190	AT5G62960
AT5G52360	AT5G63070
AT5G52610	AT5G63240
AT5G52975	AT5G63450
AT5G53520	AT5G63560
AT5G53610	AT5G63590
AT5G53640	AT5G64530
AT5G53775	AT5G64570
AT5G53780	AT5G64572
AT5G53790	AT5G64620
AT5G53840	AT5G64910
AT5G54062	AT5G65380
AT5G54067	AT5G65410
AT5G54210	AT5G65510
AT5G54215	AT5G65590
AT5G54220	AT5G65600
AT5G54225	AT5G65830
AT5G54340	AT5G66020
AT5G54350	AT5G66052
AT5G54360	AT5G66300
AT5G54710	AT5G66562
AT5G54820	AT5G66580
AT5G54990	AT5G66985
AT5G55080	AT5G67411
AT5G55131	AT5G67450
AT5G55132	AT5G67550
AT5G55330
AT5G55430
AT5G55507
AT5G56100
AT5G56200
AT5G56430
AT5G56480
AT5G56490
AT5G57640
AT5G58080
AT5G58170
AT5G58810
AT5G58820
AT5G58830
AT5G58840
AT5G58850
AT5G59105
AT5G59110
AT5G59230
AT5G59370
AT5G59520
AT5G60060
AT5G60440
AT5G60553
AT5G60615
AT5G60740
AT5G60780
AT5G61290
AT5G61350
AT5G61470
AT5G61520
AT5G61620
AT5G61700
AT5G62040
AT5G62110
AT5G62120
AT5G62480
AT5G62623
AT5G62627
AT5G62730
AT5G62830
AT5G62920
AT5G63063
AT5G63087
AT5G63230
AT5G63740
AT5G64540
AT5G64790
AT5G64810
AT5G64890
AT5G65020
AT5G65030
AT5G65370
AT5G66080
AT5G66400
