# Supplementary material for: Paternally expressed imprinted genes establish postzygotic hybridization barriers in Arabidopsis thaliana
Source: eLife journal article supplement (doi:10.7554/elife.10074), 2015-09-07
Supplement: supp [file elife-10074-supp-v1.zip]

### GO categories of genes commonly down-regulated in 3n *peg* mutants

#### **Molecular Function**

| <b>GO term</b> | <b>p-value</b> | <b>Number</b> | <b>Definition</b>                                    |
|----------------|----------------|---------------|------------------------------------------------------|
| GO:0004553     | 3,86E-05       | 7             | hydrolase activity, hydrolyzing O-glycosyl compounds |
| GO:0016798     | 9,38E-05       | 7             | hydrolase activity, acting on glycosyl bonds         |
| GO:0004650     | 8,03E-04       | 3             | polygalacturonase activity                           |
| GO:0015491     | 9,68E-03       | 2             | cation:cation antiporter activity                    |
| GO:0046910     | 1,17E-02       | 2             | pectinesterase inhibitor activity                    |
| GO:0005507     | 3,55E-02       | 2             | Copper ion binding                                   |
| GO:0015297     | 4,13E-02       | 2             | antiporter activity                                  |
| GO:0004857     | 4,31E-02       | 2             | enzyme inhibitor activity                            |
| GO:0004674     | 4,53E-02       | 3             | protein serine/threonine kinase activity             |

#### **Biological Process**

| <b>GO term</b> | <b>p-value</b> | <b>Number</b> | <b>Definition</b>                                                |
|----------------|----------------|---------------|------------------------------------------------------------------|
| GO:0005975     | 4,53E-04       | 8             | carbohydrate metabolism                                          |
| GO:0007169     | 4,52E-03       | 3             | transmembrane receptor protein tyrosine kinase signaling pathway |
| GO:0007167     | 4,52E-03       | 3             | enzyme linked receptor protein signaling pathway                 |
| GO:0007166     | 7,34E-03       | 3             | cell surface receptor linked signal transduction                 |
| GO:0042545     | 2,81E-02       | 2             | cell wall modification                                           |

### GO categories of genes commonly up-regulated in 3n *peg* mutants

#### **Molecular Function**

| <b>GO term</b> | <b>p-value</b> | <b>Number</b> | <b>Definition</b>                                       |
|----------------|----------------|---------------|---------------------------------------------------------|
| GO:0008289     | 1,96E-05       | 5             | lipid binding                                           |
| GO:0045735     | 1,01E-02       | 2             | nutrient reservoir activity                             |
| GO:0016684     | 2,16E-02       | 2             | oxidoreductase activity, acting on peroxide as acceptor |
| GO:0004601     | 2,16E-02       | 2             | peroxidase activity                                     |
| GO:0016209     | 2,84E-02       | 2             | antioxidant activity                                    |
| GO:0016789     | 2,95E-02       | 3             | carboxylic ester hydrolase activity                     |
| GO:0004091     | 3,17E-02       | 2             | carboxylesterase activity                               |
| GO:0016298     | 3,26E-02       | 2             | lipase activity                                         |

#### **Biological Process**

| <b>GO term</b> | <b>p-value</b> | <b>Number</b> | <b>Definition</b>              |
|----------------|----------------|---------------|--------------------------------|
| GO:0006869     | 4,06E-06       | 5             | lipid transport                |
| GO:0042538     | 2,39E-03       | 2             | hyperosmotic salinity response |
| GO:0006972     | 2,69E-03       | 2             | hyperosmotic response          |
| GO:0016053     | 3,80E-02       | 2             | organic acid biosynthesis      |
| GO:0046394     | 3,80E-02       | 2             | carboxylic acid biosynthesis   |
