# Supplementary material for: Paternally expressed imprinted genes establish postzygotic hybridization barriers in Arabidopsis thaliana
Source: eLife journal article supplement (doi:10.7554/elife.10074), 2015-09-07
Supplement: supp [file elife-10074-supp-v1.zip]

**Supplementary Table 1: Primers used in this study**

| Gene    | Genotyping                                                                                                                                                                                                 | Expression                                          | Imprinting                                           |
|---------|------------------------------------------------------------------------------------------------------------------------------------------------------------------------------------------------------------|-----------------------------------------------------|------------------------------------------------------|
| PEG1    | TTTACCCGTCCTGTGCGATTTG<br>TTCCAGTGGTTTTGGTAGACG                                                                                                                                                            | ATCTCCAATAACCACTACAG<br>TCATAACCACCAGAAACAGAA       |                                                      |
| PEG2    | TGGTGATGATTTATGGATTTAAC<br>ACAAGGTACGCGATTATGTCG                                                                                                                                                           | AGGACCAACATTATGGTCATACC<br>GGAAGTGATAGAAGCGGTAGAG   | AGGGAGAAACAATTGGCTTTAGA<br>CTATCACTTCCCCGAATCTCCTA   |
|         | <i>PEG2::PEG2</i> cloning:<br>CACCTCAACAACCTAAGAGATCACACCA<br>AAAATGAGTAGAGGATGAAGCTGGAT                                                                                                                   |                                                     |                                                      |
| PEG3    | TCGAATGAAGAGGACAAACAAC<br>TAAACAAACCGATTCTGACGG                                                                                                                                                            | CGAACGTTAGAGGTCATCCG<br>GCAACAACCAAGAAAGACTGG       | ATCAGAAATTTTCTCACCGGGA<br>TGAAACTGGTGTCTTCTGCTGAAC   |
| PEG4    | TCTCCATGGAGAATGTTGGAG<br>AAGGAATCGGCTTGTAAATTCG                                                                                                                                                            | CATGGAGAATGTTGGAGGAACG<br>ATTGTCACACTGATAGATAGGAGC  | ACACTGTGGAGCTTGATCTTCTG<br>TGGTTCAGGGCAGTAGCAAAG     |
| PEG5    | AACCATTTACAACGGTCACTAGC<br>TCAAACCCATCTGAATCTCG                                                                                                                                                            | GATATCTGAGAGCGGAGGAG<br>AATCACAACCTGGACTGGAC        |                                                      |
| PEG6    | TGATTGTTGGTTATTCTCCC<br>CTGTACCGAAATCCCTAGTG                                                                                                                                                               | GAGCCTGGTCATCAACTAAACC<br>TAGAAGATCAGCACAGGAACG     | AGGATTCTCCCTACAACCTTCTACA<br>GATTATATGCATCATCTCGTCCG |
| PEG7    | ACGGTAATGGCCAAATTTAG<br>CTTCGCACTGATTTCTGGTC                                                                                                                                                               | TTTGTGAACCAGGGCAAGAG<br>ATTCGAGACGAGTCTTTGAGTC      | GCCTATCGAATATTCTGAT<br>GCTTGATCTTCTTAGGTTTC          |
| PEG8    | AGAACCAAAACCGAACCAAC<br>TCGGGTCTTGTTTGTTTCAC                                                                                                                                                               | TTACCGATAGGAATCTGAGAAGTC<br>CATAGGCGGCCTAAGGAGTTTAG |                                                      |
| PEG9    | GAAAGTCTATGTCCACGAGCG<br>GAAGAAATTCAAATCCTCGGC ( <i>peg9-1</i> )<br>GAAAGTCTATGTCCACGAGCG<br>ACGAGCTCAAGAAGGGAAATC ( <i>peg9-2</i> )                                                                       | GCTCAAGAAGGGAAATCTAAGTC<br>AAACCTTGTCGGTCTTGTAGG    |                                                      |
| ADM     | ATTGACATTTCTTGGGGTTC<br>ATATTTCTCGTTGGGGACCAG ( <i>adm-2</i> )                                                                                                                                             | TTGAAAGAGTTTGC GGATGTG<br>AGGACCAACATTATGGTCATACC   |                                                      |
| FXG1    | TTCCCATAGCTAAAAGAGGC<br>CTCCTCCACGACTACGAACAG                                                                                                                                                              | CTTCATAGCGGAGAGTCTTGG<br>TTGACGTAGAGTAGAGTTAAGAGC   |                                                      |
| HDG10   | AAGCGTGAATCACAAGTTTG<br>TGTCCCAAAAAGTTGAAAATC                                                                                                                                                              | GGTCGTTCTAAGGTAACATGGA<br>TCCTCTGAAGAGTAGCGGTC      | GGTCGTTCTAAGGTAACATGGA<br>TCCTCTGAAGAGTAGCGGTC       |
| PKR2    | TTCTGATTTTTCAACCGATGG<br>GGGGAGGAGTATCTGGTGAAG                                                                                                                                                             | ATGCTGATAGAACAAGTCACTGG<br>CATACATCACCTGCTTGCCG     |                                                      |
| SUVH7   | CTCTTGATCACGAGCGTTACC<br>TGCCATGTTTCGTAATCTCC ( <i>suvh7-1</i> )<br>CAGTTTCTGTCTCTGCTTCGG<br>CCGCAAAATTCCTCATTCTC ( <i>suvh7-2</i> )<br>TTATTGGTTTGTGATTTGCTCG<br>AACCATTGATTTACGAGTGCG ( <i>suvh7-3</i> ) | TGCTGGTCTAGTAGTACTGGTCCA<br>CACCCGCATCACAAGAATAGTTG | GTGAAATGTGCTTAGTGGGGCTT<br>CCTCTCAGACTCTAACGTCATTCC  |
| VIM5    | TATATGGAAGAAGGTAATGAAATA<br>TCAAAAGAAATCATGGCAACC                                                                                                                                                          | GTTGTCAGGTCTACCAAGGA<br>AAACGGCACATCTGTATTCCA       |                                                      |
| YUC10   | CCTGAATCTCGCCATCGCAATC<br>CCAAGAGCTTTTCGTCAACTACC                                                                                                                                                          | GCGAGATTGAGGTTATCAATGG<br>GTAACCAGTAGCAAAACACAATCG  |                                                      |
| Actin11 |                                                                                                                                                                                                            | AACTTTCAACACTCCTGCCATG<br>CTGCAAGGTCCAACGCAGA       |                                                      |
| AGL35   |                                                                                                                                                                                                            | GGAACAATGAACCATCTTCC<br>AAGAAGAACCATCTCAACC         |                                                      |
| AGL36   |                                                                                                                                                                                                            | GTGCTCTCATCTACAGTCCA<br>CATCATCTTCTTGGTTCGGG        |                                                      |
| PHE1    |                                                                                                                                                                                                            | TCCAACCCGAAAATCCAT<br>CGCATGTGCGGTCATCC             |                                                      |
| AGL40   |                                                                                                                                                                                                            | AATATACTACTGAGGTGCTG<br>ACCAGTTTCCCTACTGTGTTCTC     |                                                      |
| AGL62   |                                                                                                                                                                                                            | CCTCCTCACCACACAACAA<br>ACCTTGAACCCCTCGAGTT          |                                                      |
| AGL90   |                                                                                                                                                                                                            | CTTGTGCTCTCATCTATAGTCCA<br>GTTTCTTGATCCATCATCTTCTCG |                                                      |
| AGL96   |                                                                                                                                                                                                            | GTGAACCTTGCTGATCTCTCCCC<br>GCTCTCTCTTTATAGGTCGCCAA  |                                                      |
