# Supplementary material for: Paternally expressed imprinted genes establish postzygotic hybridization barriers in Arabidopsis thaliana
Source: eLife journal article supplement (doi:10.7554/elife.10074), 2015-09-07

Col x Ler    Ler x Col

**PEG2**

**G<sup>Col</sup>/A<sup>Ler</sup>**

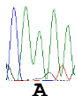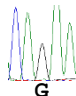

**PEG3**

**T<sup>Col</sup>/A<sup>Ler</sup>**

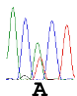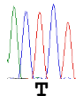

**PEG4**

**C<sup>Col</sup>/G<sup>Ler</sup>**

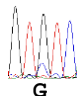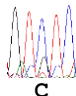

**PEG6**

**T<sup>Col</sup>/C<sup>Ler</sup>**

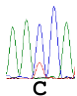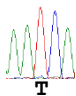

**PEG7**

**A<sup>Col</sup>/C<sup>Ler</sup>**

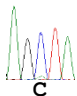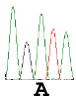

**HDG10**

**C<sup>Col</sup>/A<sup>Ler</sup>**

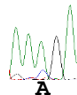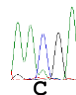

Supplement: supp [file elife-10074-supp-v1.zip]
