# Supplementary figures and images for: Paternally expressed imprinted genes establish postzygotic hybridization barriers in Arabidopsis thaliana
Source: eLife journal article supplement (doi:10.7554/elife.10074), 2015-09-07

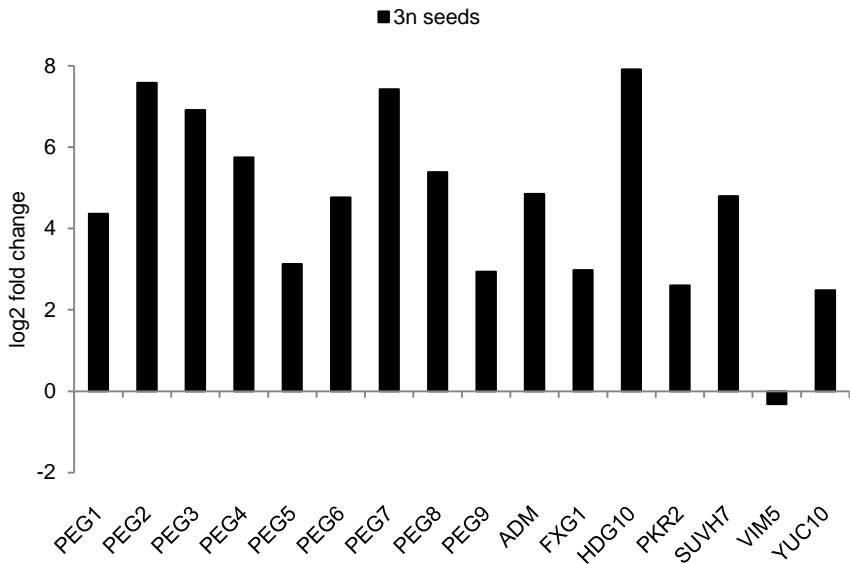

Supplement: supp [file elife-10074-supp-v1.zip]

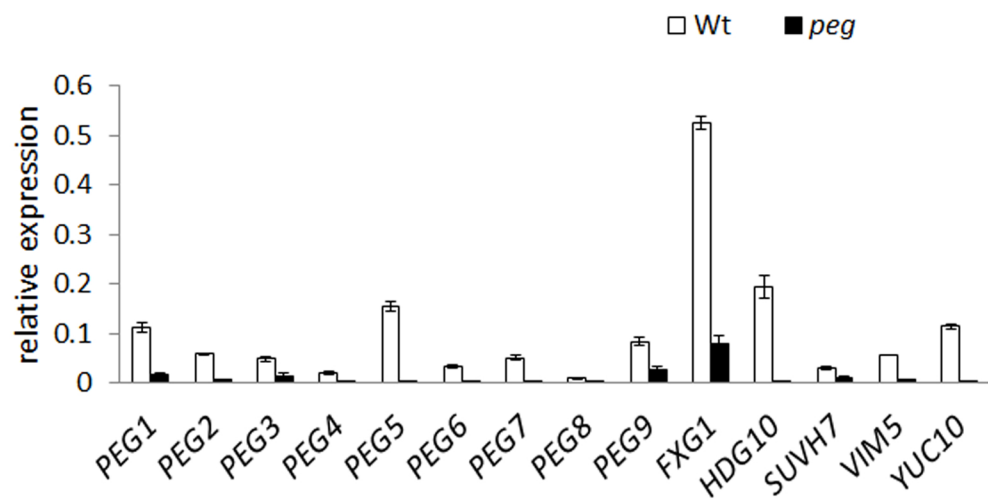

Supplement: supp [file elife-10074-supp-v1.zip]

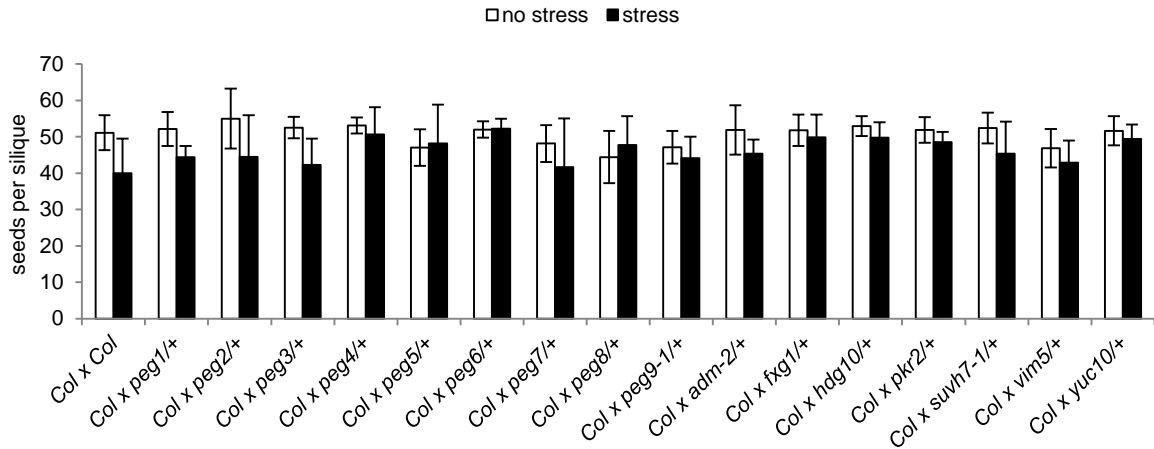

Supplement: supp [file elife-10074-supp-v1.zip]

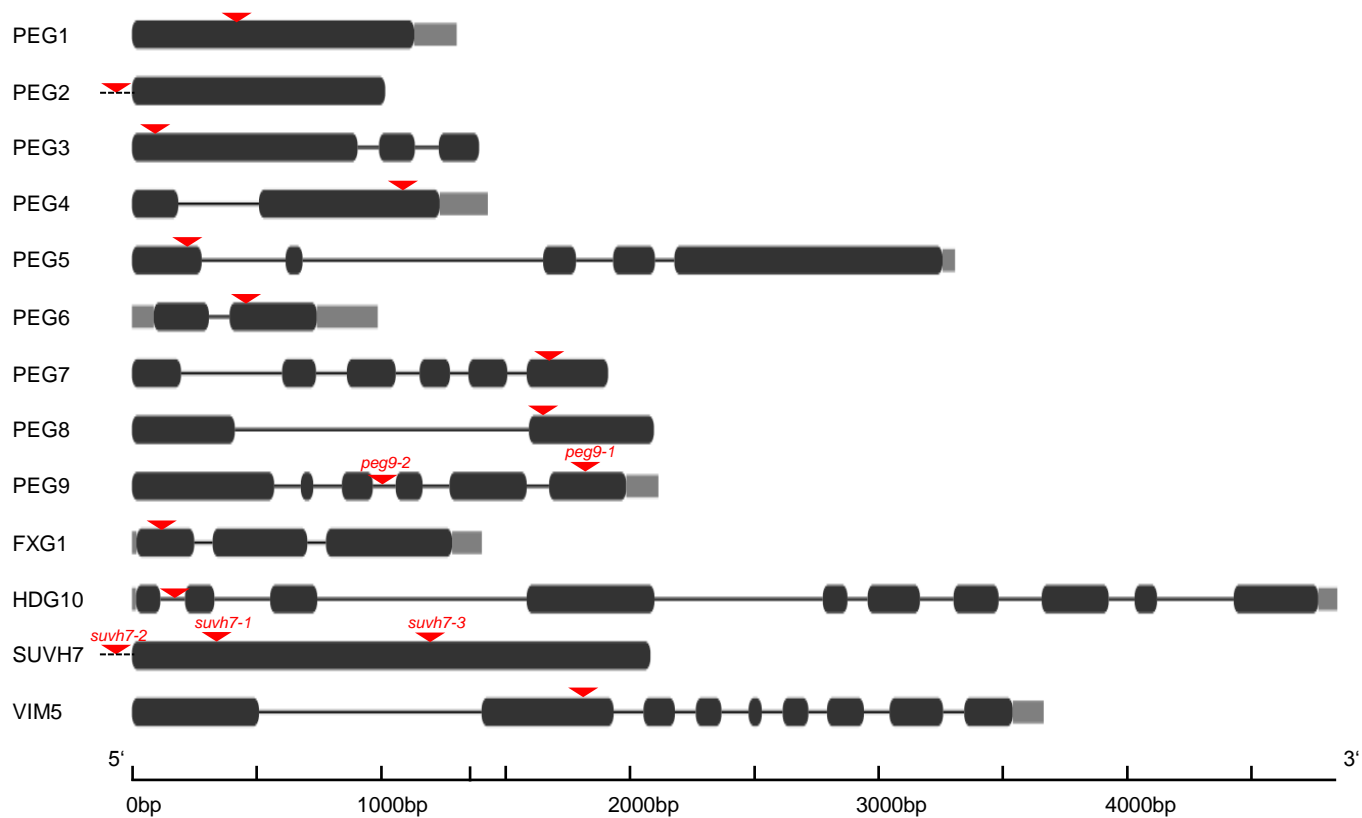

Supplement: supp [file elife-10074-supp-v1.zip]

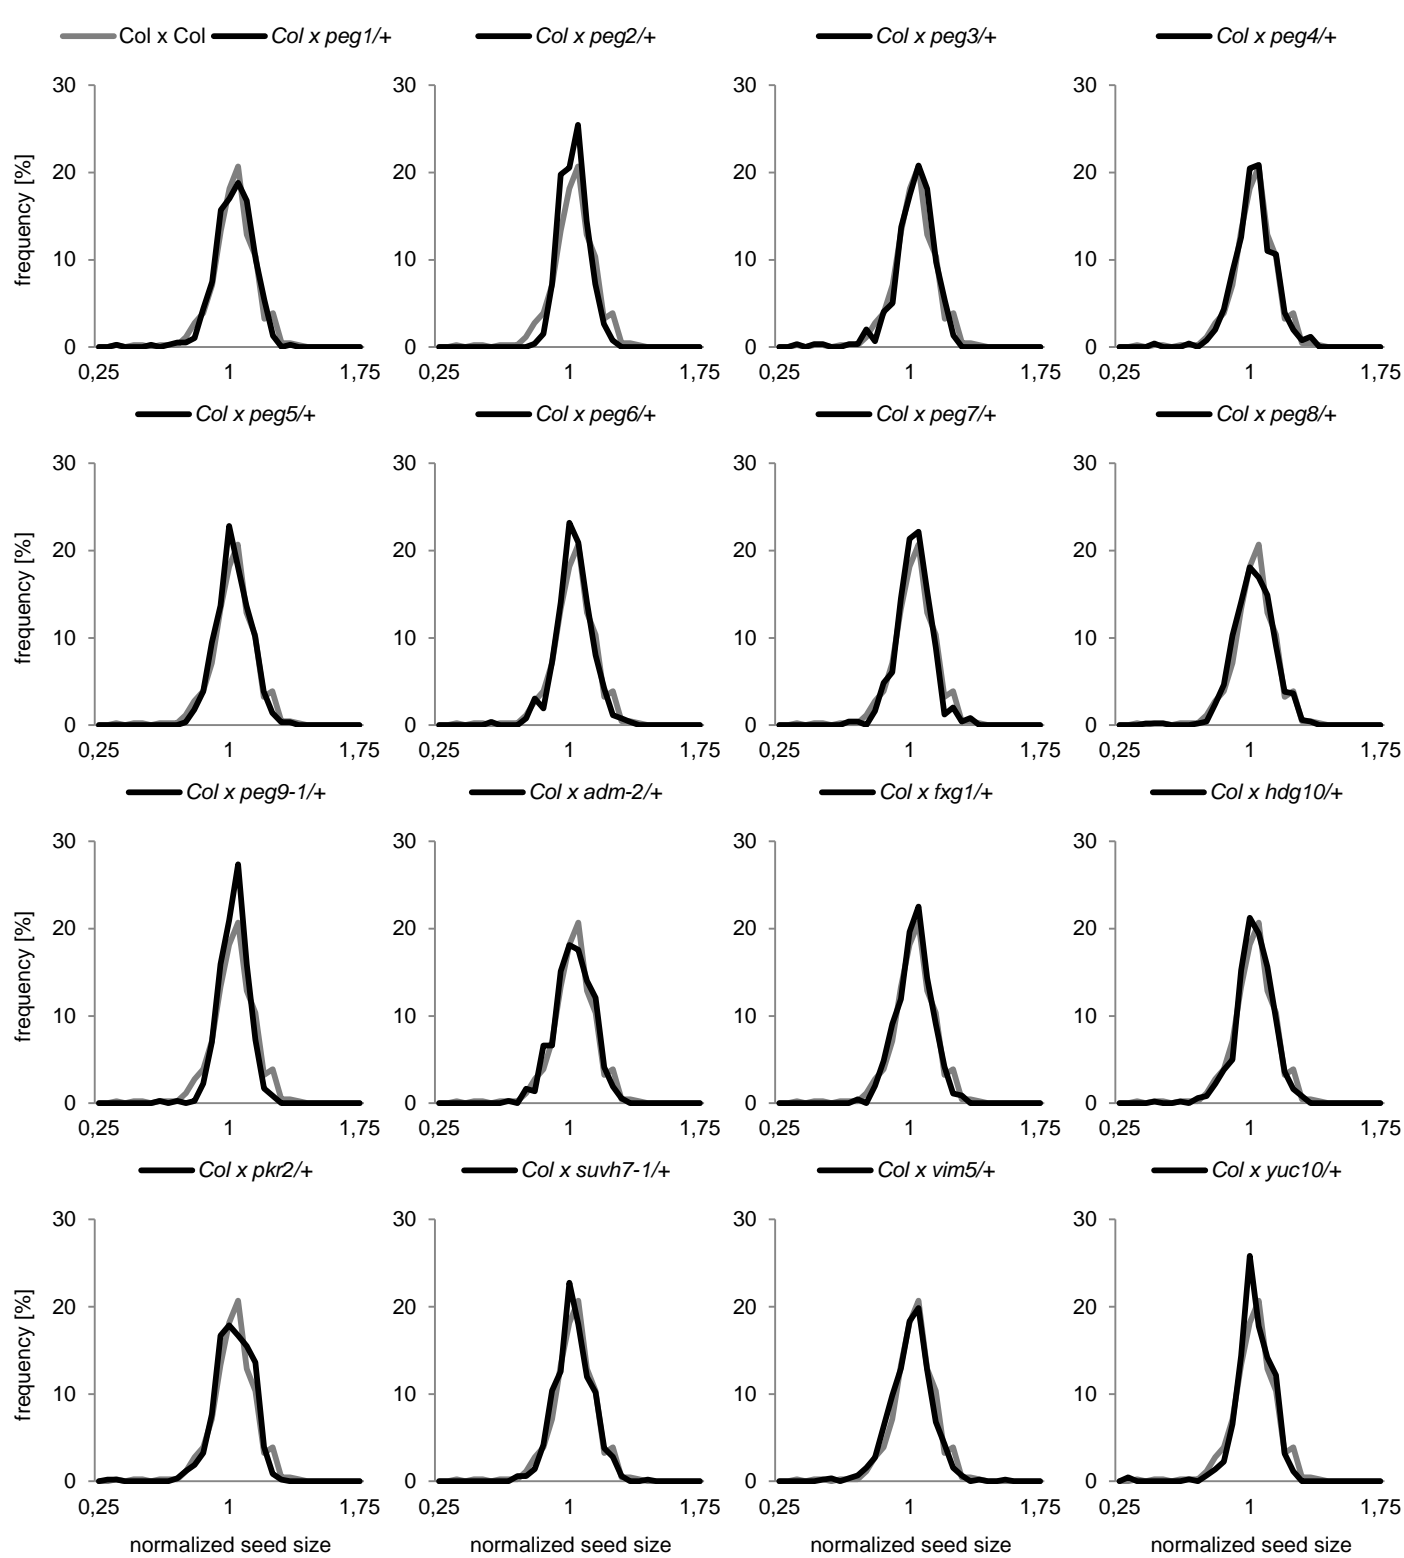

Supplement: supp [file elife-10074-supp-v1.zip]

2n seeds

3n seeds

4 DAP

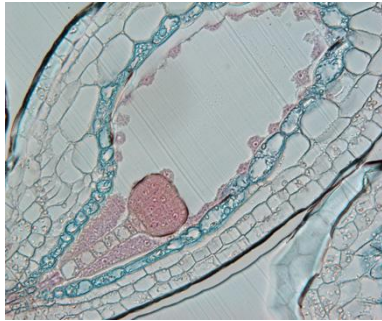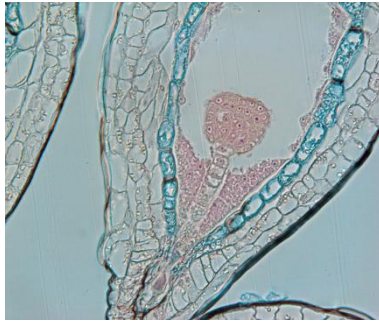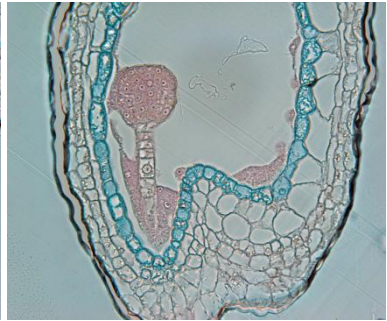

6 DAP

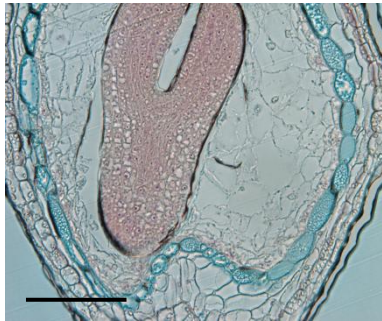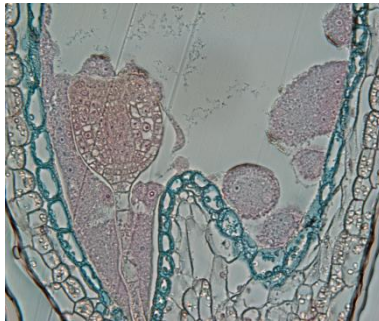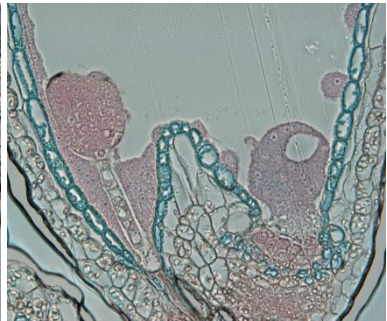

Supplement: supp [file elife-10074-supp-v1.zip]

■ non-collapsed

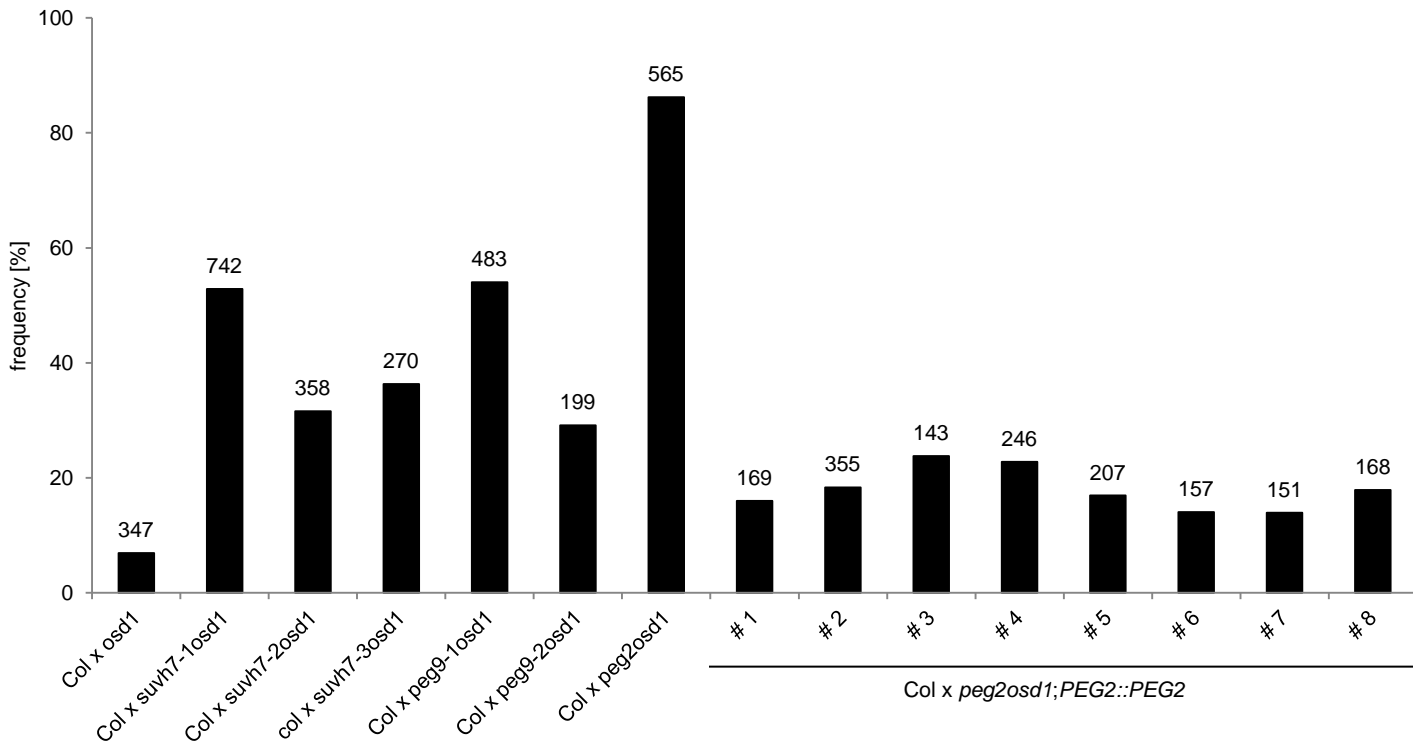

Supplement: supp [file elife-10074-supp-v1.zip]

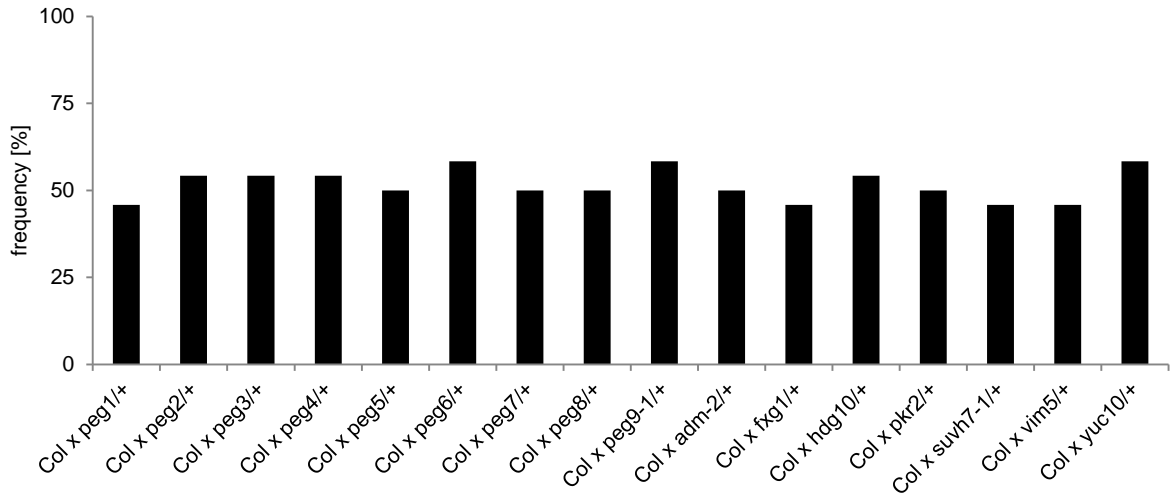

Supplement: supp [file elife-10074-supp-v1.zip]
